# Supplementary material for: Solid-phase synthesis of tetrasubstituted pyrrolo[2,3-d]pyrimidines
Source: Royal Society of Chemistry journal article supplement (doi:10.1039/c2ob06899k), 2012-01-01

## Supporting Information

### Solid-Phase Synthesis of Tetrasubstituted Pyrrolo[2,3-*d*]pyrimidine

Ji Hoon Lee<sup>a</sup> and Hyun-Suk Lim<sup>\*,a,b</sup>

<sup>a</sup>*Department of Biochemistry and Molecular Biology, and Indiana University Simon Cancer Center, Indiana University School of Medicine, Indianapolis, Indiana 46202, USA*

<sup>b</sup>*Department of Chemistry, Pohang University of Science and Technology (POSTECH), Pohang 790-784, South Korea*

#### Table of Contents:

|     |                                                                                      |
|-----|--------------------------------------------------------------------------------------|
| S2  | Figure S1: LC/MS traces of crude products <b>14a-h</b>                               |
| S4  | Table S1: Purity of crude final products <b>15</b>                                   |
| S5  | Table S2: Mass data of crude final products <b>15</b>                                |
| S7  | Figure S2: LC/MS data for <b>15</b>                                                  |
| S10 | Figure S3: <sup>1</sup> H and <sup>13</sup> C NMR spectra for compounds <b>14a-h</b> |
| S18 | Figure S4: <sup>1</sup> H and <sup>13</sup> C NMR spectra for compounds <b>15</b>    |

Figure S1. LC/MS traces of crude products **14a-h**.

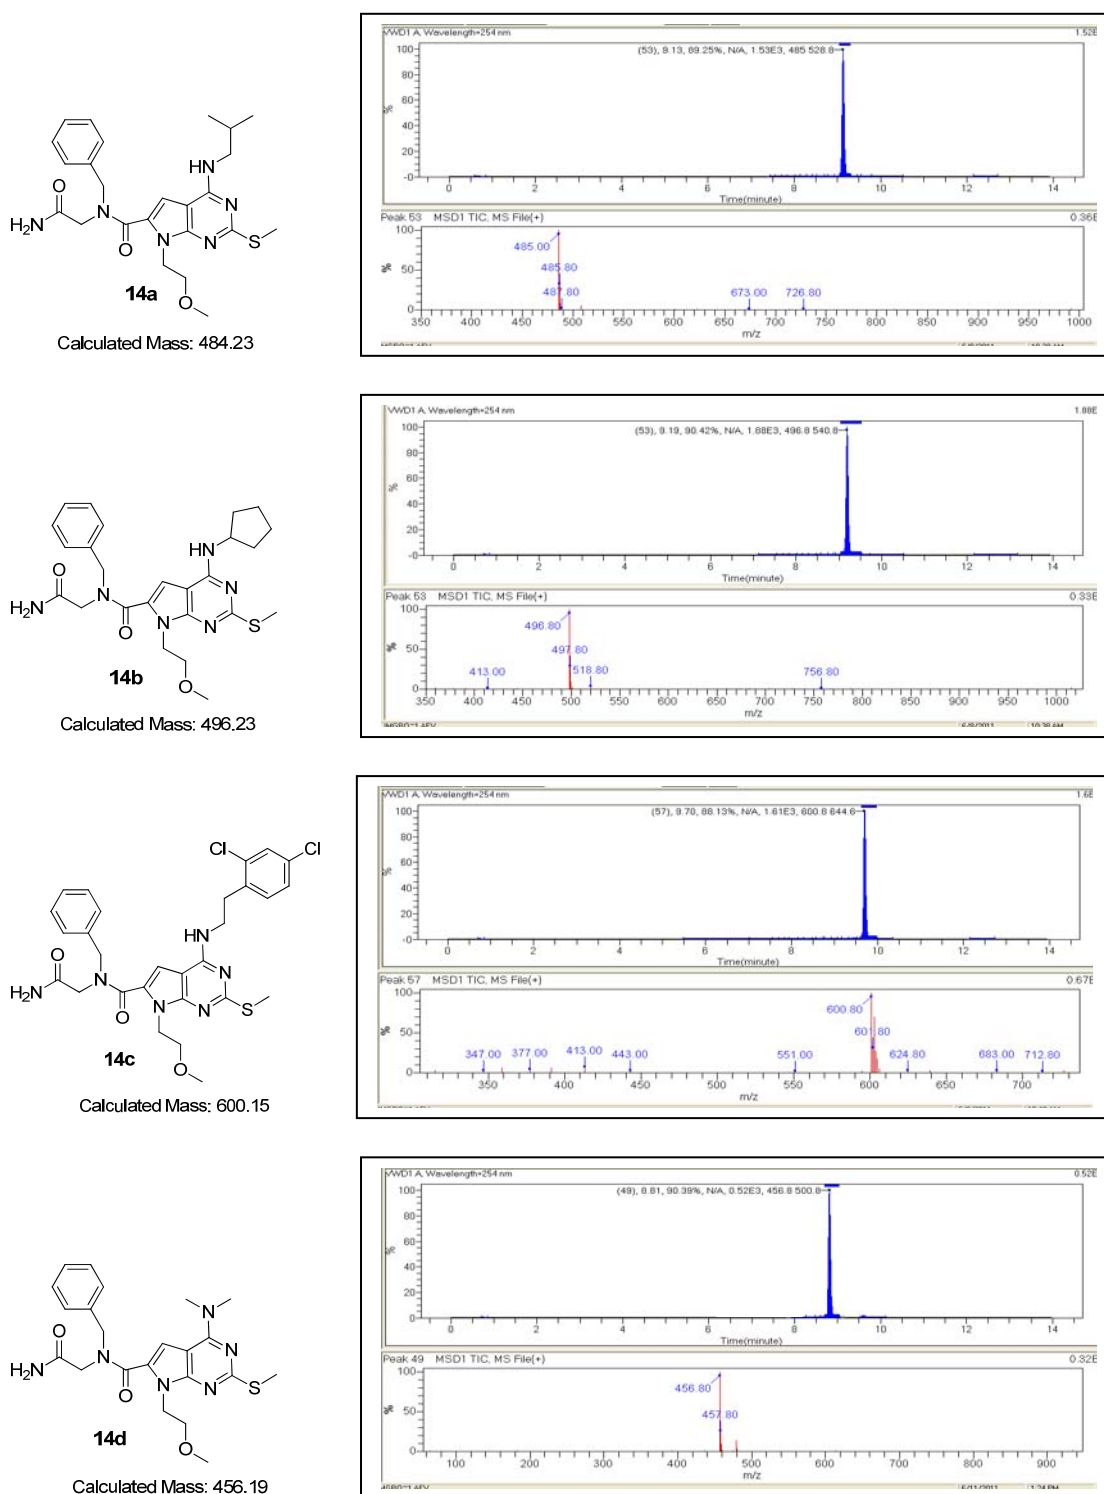

Figure S1. (Cont'd)

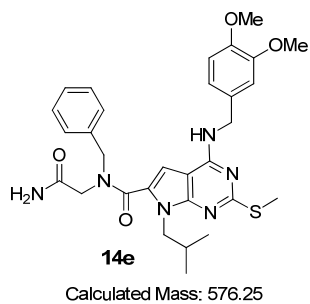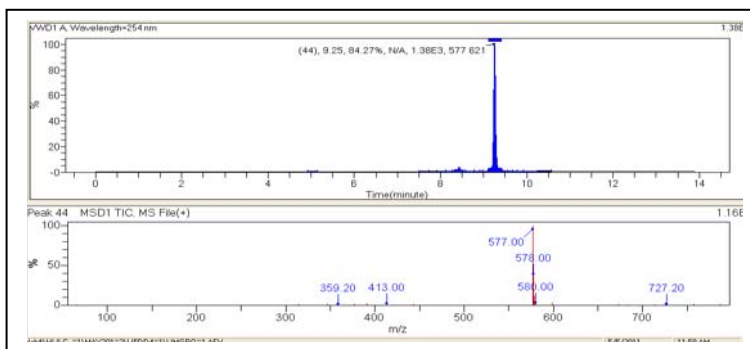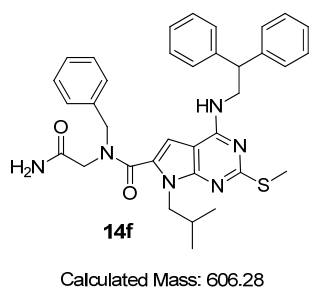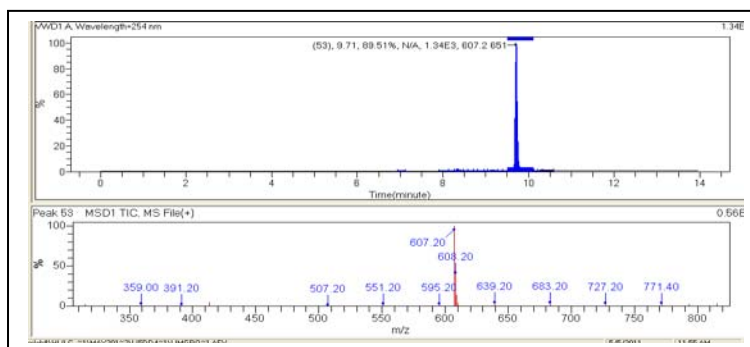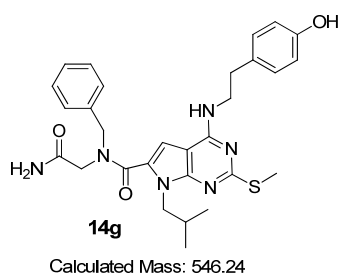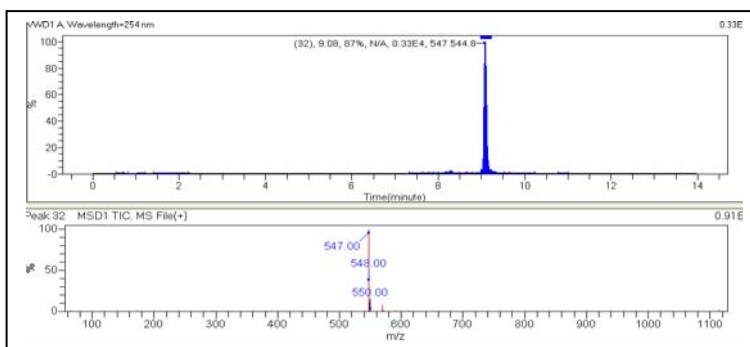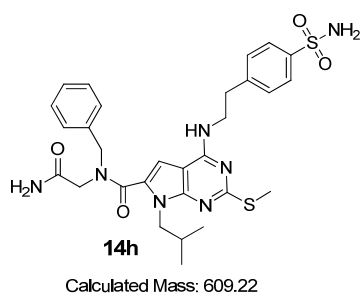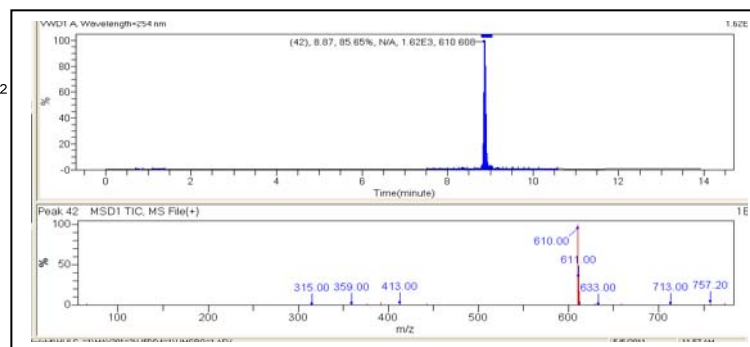

**Table S1.** Purity of crude final products **15**.

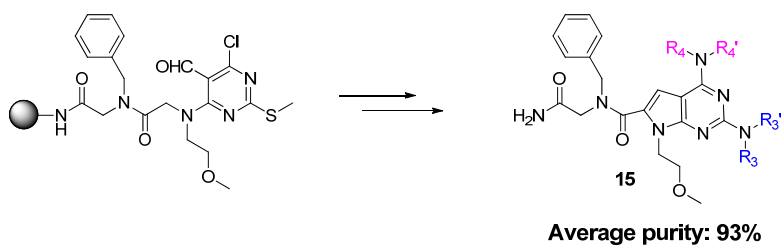

| Purity (%) <sup>a</sup>         |    | HNR <sub>4</sub> R <sub>4</sub> |    |    |    |    |    |    |    |    |
|---------------------------------|----|---------------------------------|----|----|----|----|----|----|----|----|
|                                 |    | A                               | B  | C  | D  | E  | F  | G  | H  | I  |
| HNR <sub>3</sub> R <sub>3</sub> | 1  | 90                              | 90 | 93 | 95 | 94 | 89 | 93 | 94 | 89 |
|                                 | 2  | 92                              | 90 | 95 | 96 | 91 | 91 | 94 | 93 | 89 |
|                                 | 3  | 97                              | 95 | 96 | 98 | 92 | 93 | 95 | 97 | 92 |
|                                 | 4  | 96                              | 94 | 97 | 98 | 94 | 93 | 94 | 93 | 91 |
|                                 | 5  | 96                              | 95 | 91 | 97 | 94 | 93 | 96 | 95 | 91 |
|                                 | 6  | 93                              | 91 | 91 | 97 | 93 | 91 | 94 | 97 | 90 |
|                                 | 7  | 94                              | 92 | 93 | 96 | 92 | 91 | 95 | 94 | 89 |
|                                 | 8  | 91                              | 95 | 92 | 95 | 90 | 93 | 94 | 94 | 90 |
|                                 | 9  | 90                              | 91 | 89 | 94 | 91 | 87 | 88 | 89 | 88 |
|                                 | 10 | 91                              | 93 | 91 | 96 | 92 | 95 | 93 | 96 | 91 |
|                                 | 11 | 95                              | 90 | 91 | 97 | 89 | 93 | 92 | 93 | 90 |
|                                 | 12 | 92                              | 90 | 92 | 97 | 89 | 93 | 93 | 91 | 91 |

<sup>a</sup>Purity assessed by HPLC.

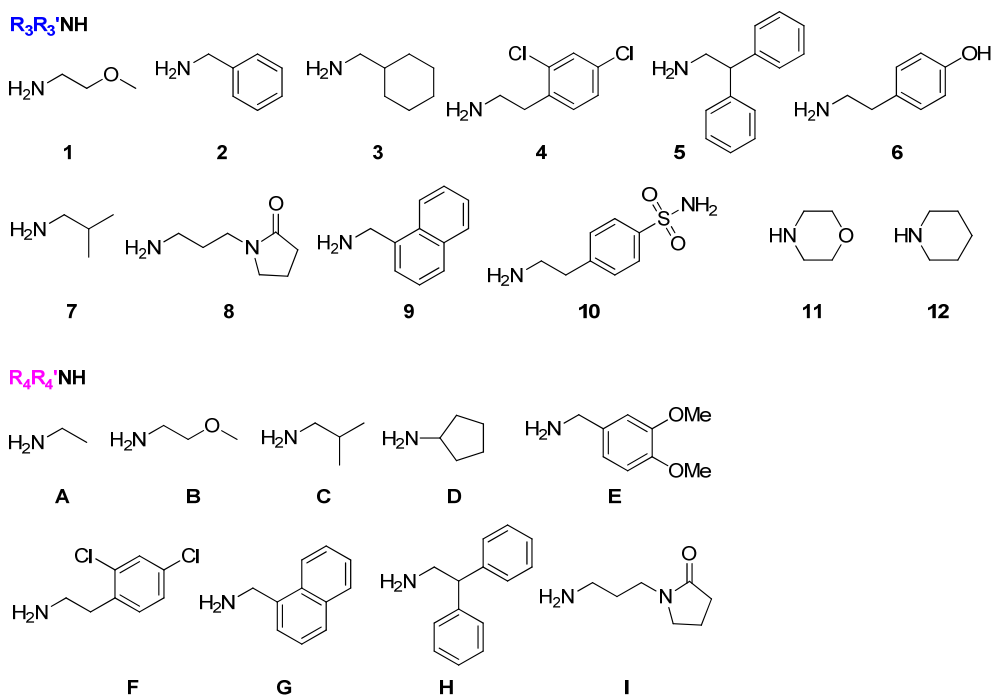

**Table S2.** Mass data of crude final products **15**.

| Entry | Calculated Mass (M) | Observed Mass (M+H) | Entry | Calculated Mass (M) | Observed Mass (M+H) |
|-------|---------------------|---------------------|-------|---------------------|---------------------|
| A-1   | 483.26              | 484.20              | D-1   | 523.29              | 524.20              |
| A-2   | 515.26              | 516.00              | D-2   | 555.30              | 556.20              |
| A-3   | 521.31              | 522.20              | D-3   | 561.34              | 562.20              |
| A-4   | 597.20              | 598.00              | D-4   | 637.23              | 638.00              |
| A-5   | 605.31              | 606.00              | D-5   | 645.34              | 646.20              |
| A-6   | 545.28              | 546.00              | D-6   | 585.31              | 586.00              |
| A-7   | 481.28              | 482.00              | D-7   | 521.31              | 522.00              |
| A-8   | 550.30              | 551.00              | D-8   | 590.33              | 591.20              |
| A-9   | 565.28              | 566.20              | D-9   | 605.31              | 606.00              |
| A-10  | 608.25              | 609.00              | D-10  | 648.28              | 649.00              |
| A-11  | 495.26              | 496.00              | D-11  | 535.29              | 536.00              |
| A-12  | 493.28              | 494.20              | D-12  | 533.31              | 534.20              |
| B-1   | 513.27              | 514.00              | E-1   | 605.30              | 606.00              |
| B-2   | 545.28              | 546.20              | E-2   | 637.30              | 638.00              |
| B-3   | 551.32              | 552.20              | E-3   | 643.35              | 644.20              |
| B-4   | 627.21              | 628.00              | E-4   | 719.24              | 720.00              |
| B-5   | 635.32              | 636.20              | E-5   | 727.35              | 728.00              |
| B-6   | 575.29              | 576.00              | E-6   | 667.31              | 668.00              |
| B-7   | 511.29              | 512.20              | E-7   | 603.32              | 604.00              |
| B-8   | 580.31              | 581.00              | E-8   | 672.34              | 673.20              |
| B-9   | 595.29              | 596.20              | E-9   | 687.32              | 688.00              |
| B-10  | 638.26              | 636.80              | E-10  | 730.29              | 731.00              |
| B-11  | 525.27              | 526.00              | E-11  | 617.30              | 618.00              |
| B-12  | 523.29              | 524.20              | E-12  | 615.32              | 616.20              |
| C-1   | 511.29              | 512.20              | F-1   | 627.21              | 628.00              |
| C-2   | 543.30              | 545.20              | F-2   | 659.22              | 660.00              |
| C-3   | 549.34              | 550.20              | F-3   | 665.26              | 666.00              |
| C-4   | 625.23              | 626.00              | F-4   | 741.16              | 741.80              |
| C-5   | 633.34              | 634.20              | F-5   | 749.26              | 750.00              |
| C-6   | 573.31              | 574.20              | F-6   | 689.23              | 690.00              |
| C-7   | 509.31              | 510.20              | F-7   | 625.23              | 626.00              |
| C-8   | 578.33              | 579.20              | F-8   | 694.25              | 695.00              |
| C-9   | 593.31              | 594.20              | F-9   | 709.23              | 710.00              |
| C-10  | 636.28              | 637.00              | F-10  | 752.21              | 753.00              |
| C-11  | 523.29              | 524.20              | F-11  | 639.21              | 640.00              |
| C-12  | 521.31              | 522.20              | F-12  | 637.23              | 638.00              |

**Table S2.** (Cont'd)

| Entry | Calculated Mass (M) | Observed Mass (M+H) | Entry | Calculated Mass | Observed Mass |
|-------|---------------------|---------------------|-------|-----------------|---------------|
| G-1   | 595.29              | 596.00              | I-1   | 580.31          | 581.20        |
| G-2   | 627.30              | 628.00              | I-2   | 612.32          | 613.20        |
| G-3   | 633.34              | 634.20              | I-3   | 618.36          | 619.20        |
| G-4   | 709.23              | 710.00              | I-4   | 694.25          | 695.00        |
| G-5   | 717.34              | 718.20              | I-5   | 702.36          | 703.20        |
| G-6   | 657.31              | 658.00              | I-6   | 642.33          | 643.20        |
| G-7   | 593.31              | 594.20              | I-7   | 578.33          | 579.20        |
| G-8   | 662.33              | 663.20              | I-8   | 647.35          | 648.20        |
| G-9   | 677.31              | 678.00              | I-9   | 662.33          | 663.20        |
| G-10  | 720.28              | 721.00              | I-10  | 705.31          | 706.00        |
| G-11  | 607.29              | 608.00              | I-11  | 592.31          | 593.20        |
| G-12  | 605.31              | 606.00              | I-12  | 590.33          | 591.20        |
| H-1   | 635.32              | 636.20              |       |                 |               |
| H-2   | 667.33              | 668.20              |       |                 |               |
| H-3   | 673.37              | 674.20              |       |                 |               |
| H-4   | 749.26              | 750.00              |       |                 |               |
| H-5   | 757.37              | 758.20              |       |                 |               |
| H-6   | 697.34              | 698.20              |       |                 |               |
| H-7   | 633.34              | 634.20              |       |                 |               |
| H-8   | 702.36              | 703.20              |       |                 |               |
| H-9   | 717.34              | 718.00              |       |                 |               |
| H-10  | 760.32              | 761.20              |       |                 |               |
| H-11  | 647.32              | 648.00              |       |                 |               |
| H-12  | 645.34              | 646.20              |       |                 |               |

Figure S2. LC/MS data for 15.

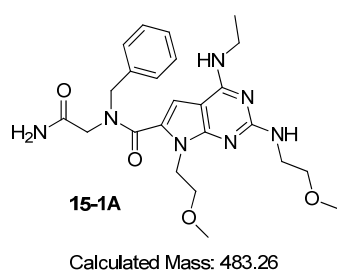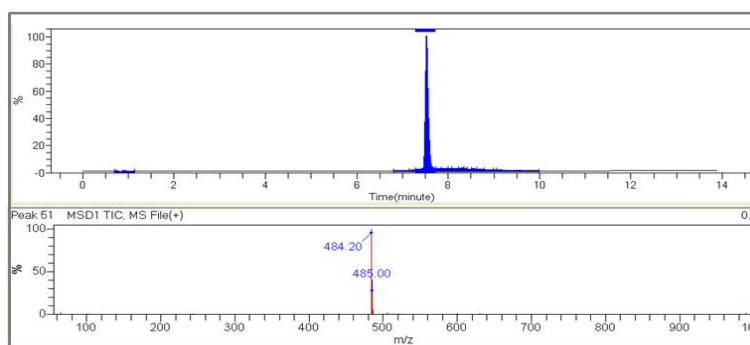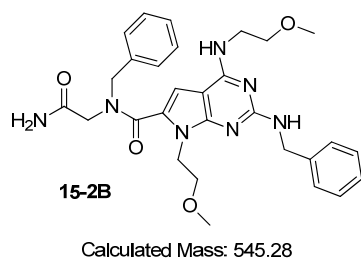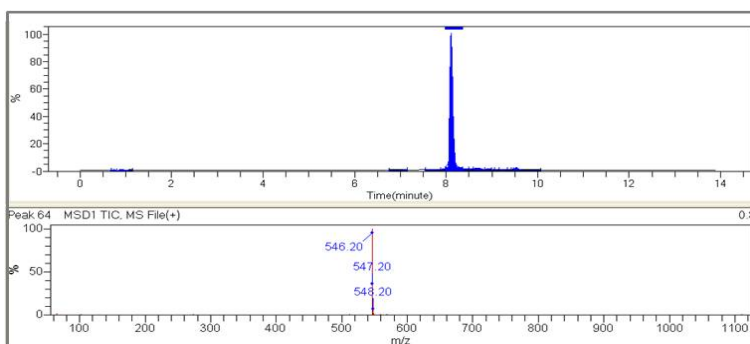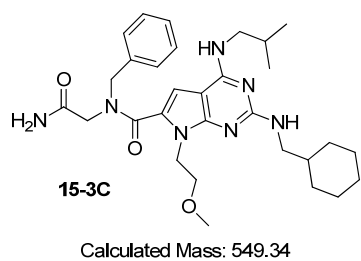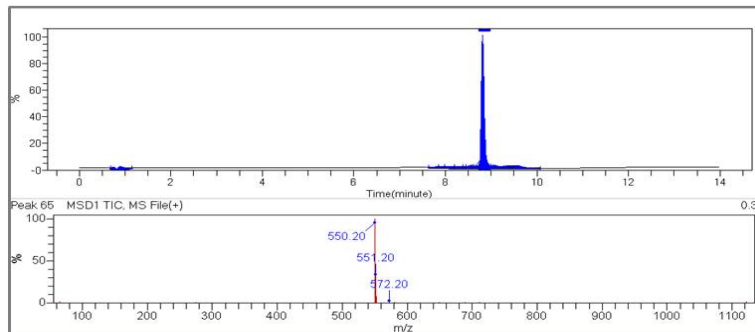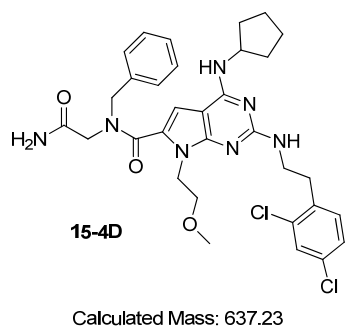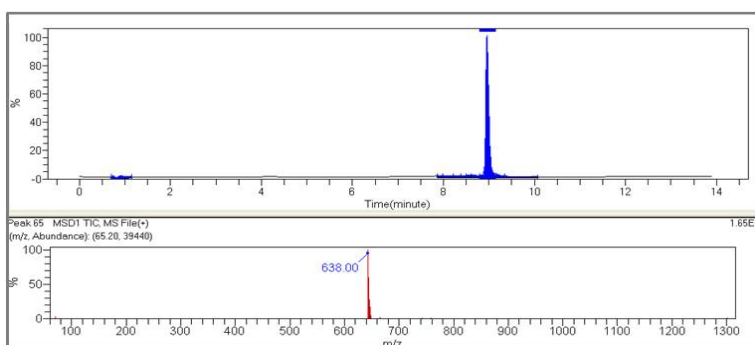

Figure S2. (Cont'd).

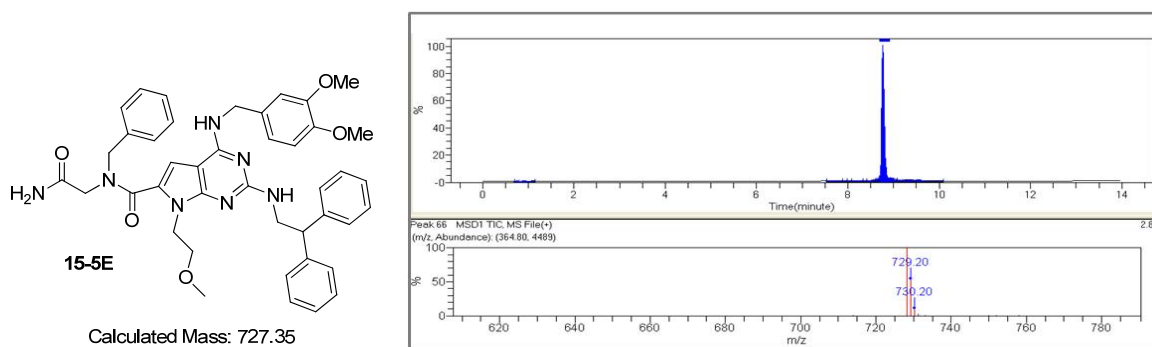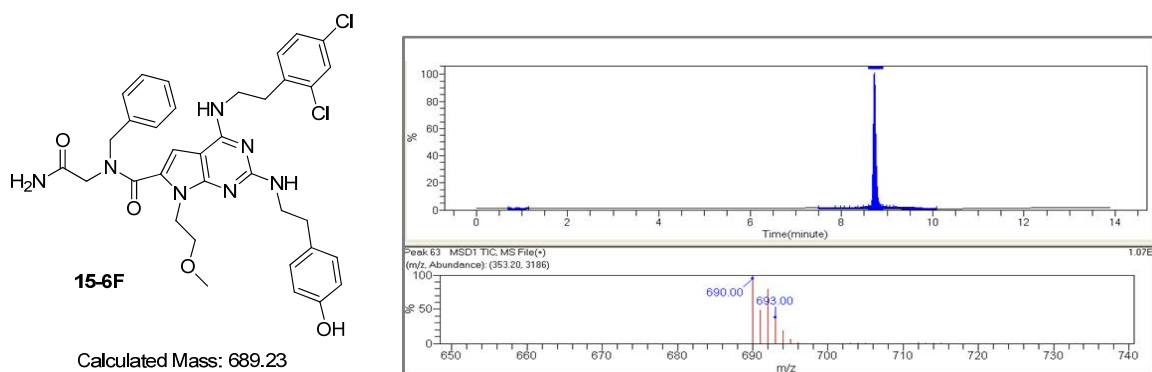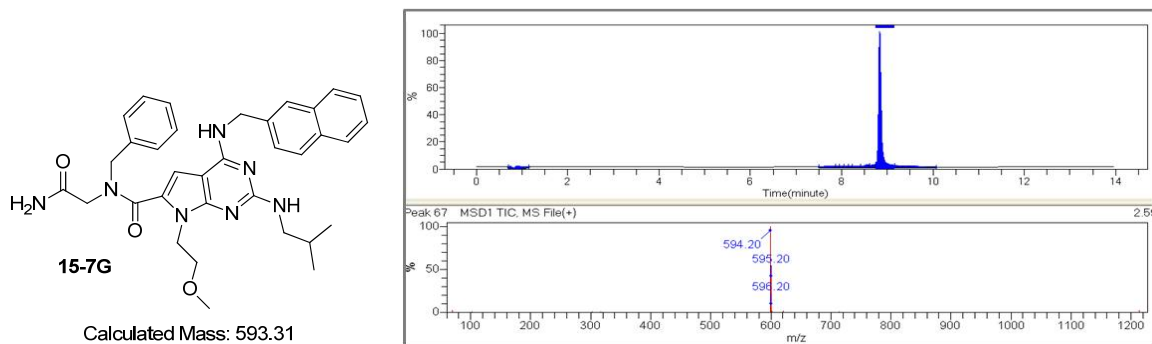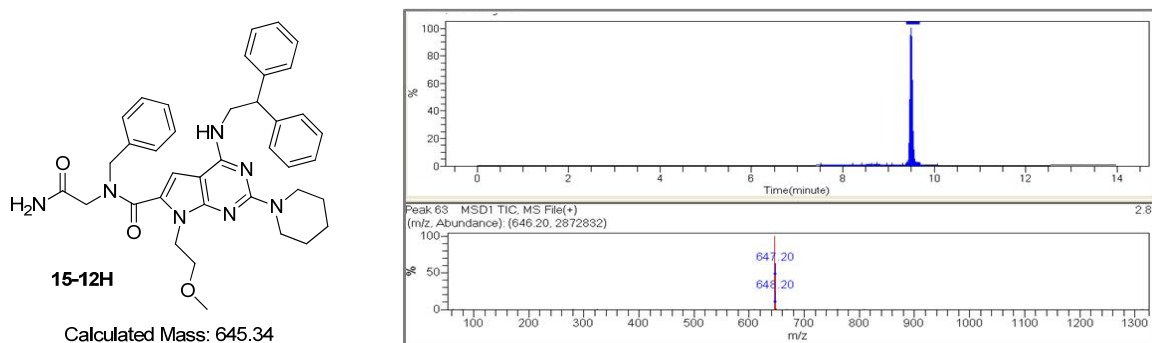



Figure S2. (Cont'd).

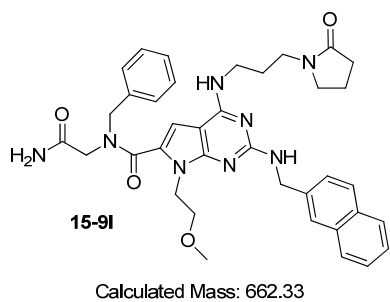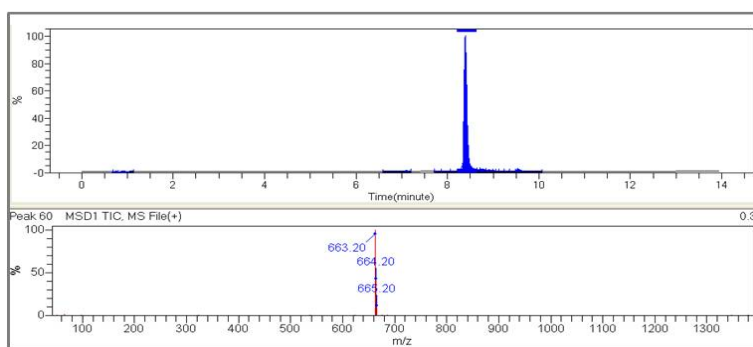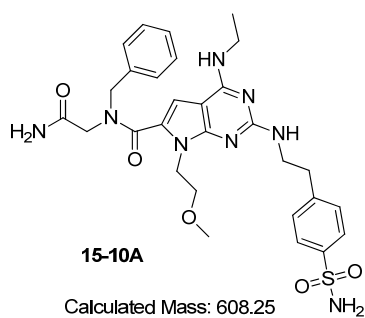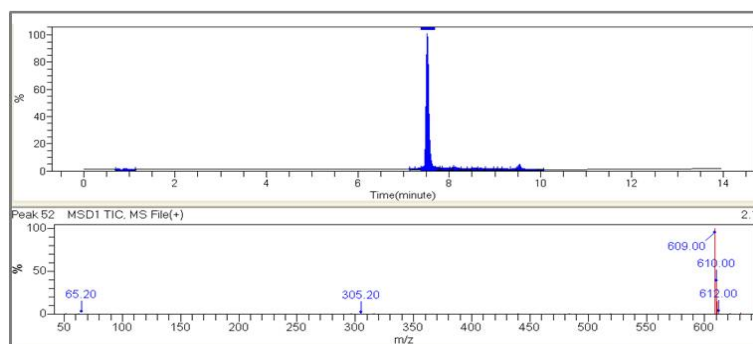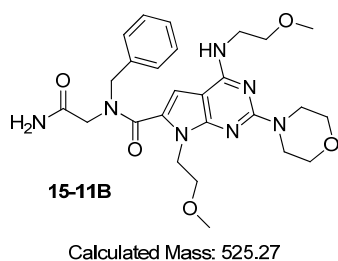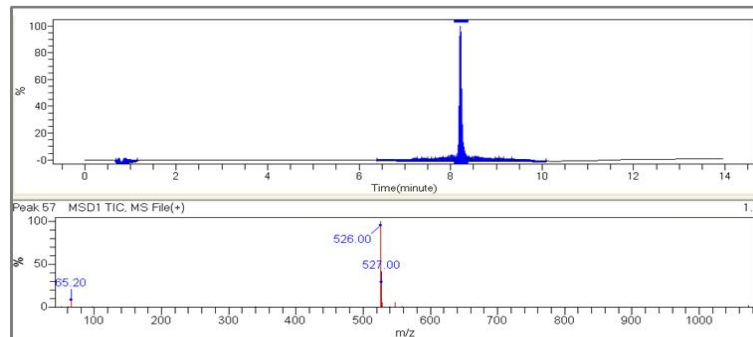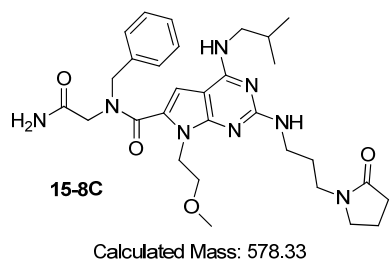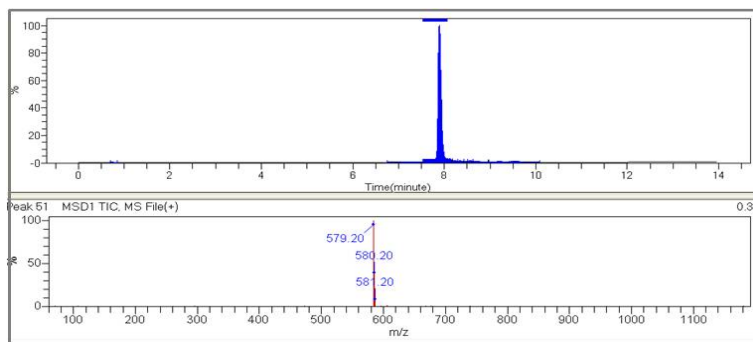

Figure S3.  $^1\text{H}$  and  $^{13}\text{C}$  NMR spectra for compounds **14a-h**.

14a

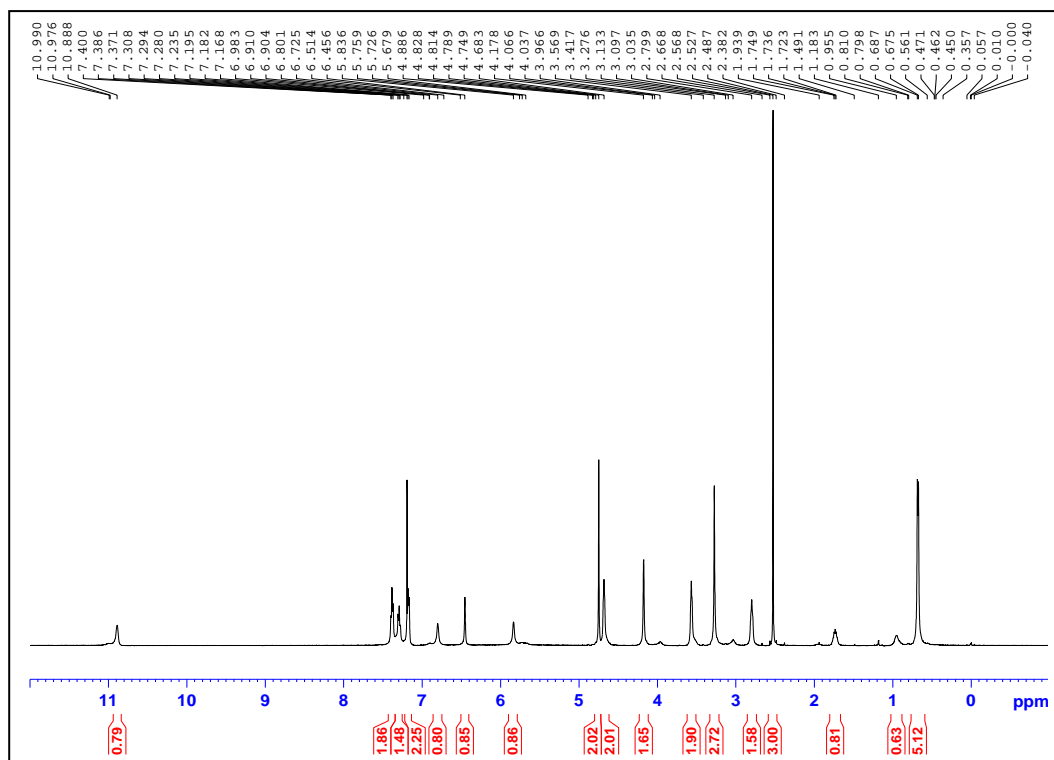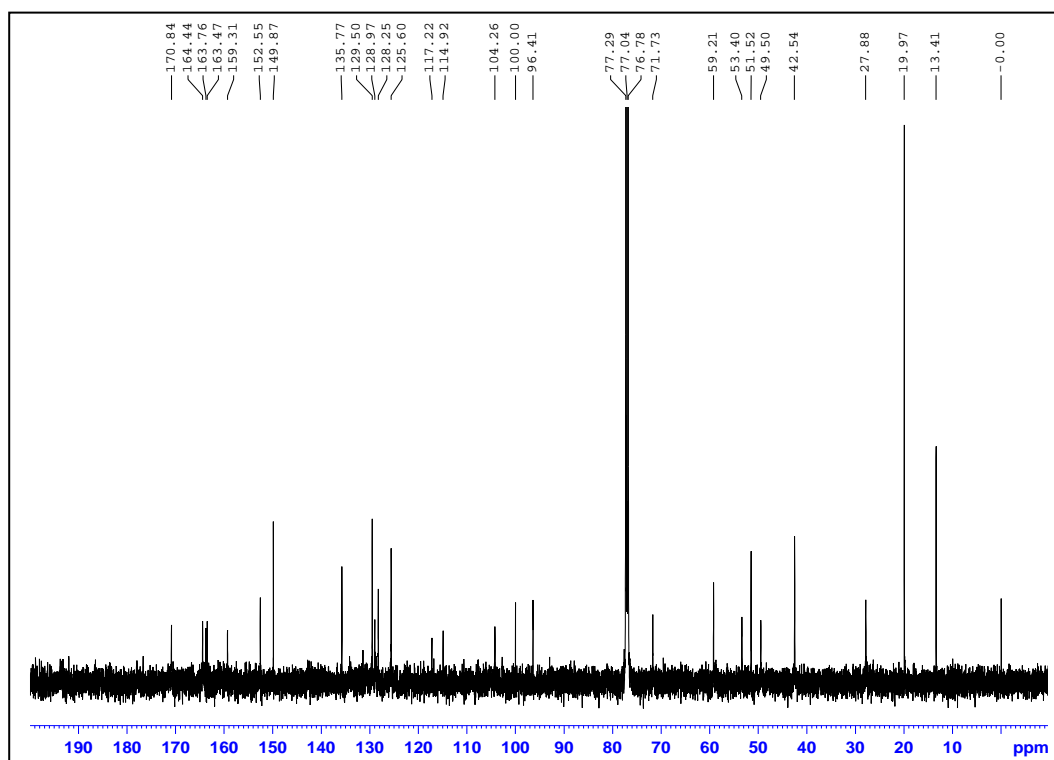

14b

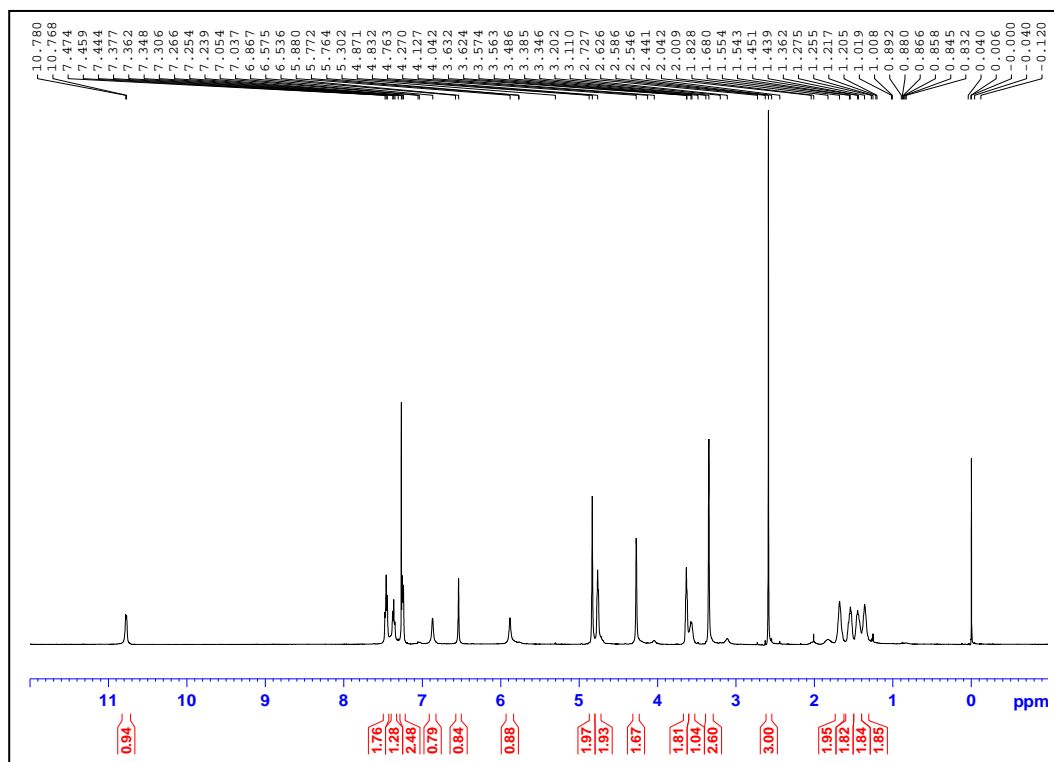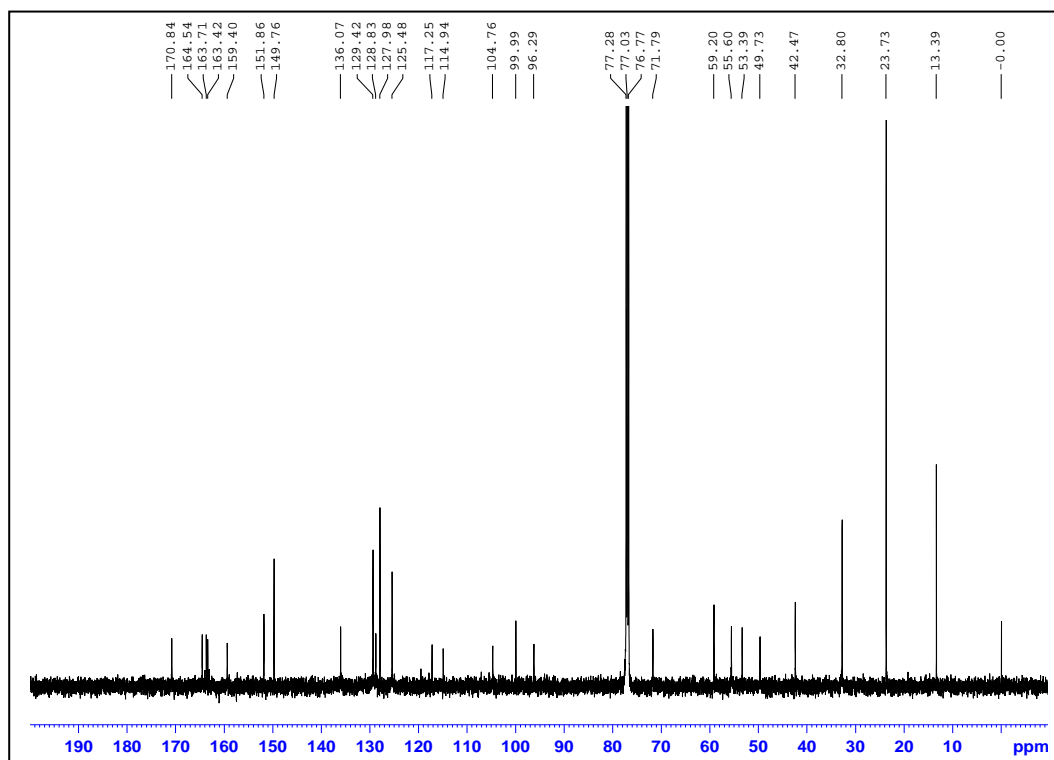

14c

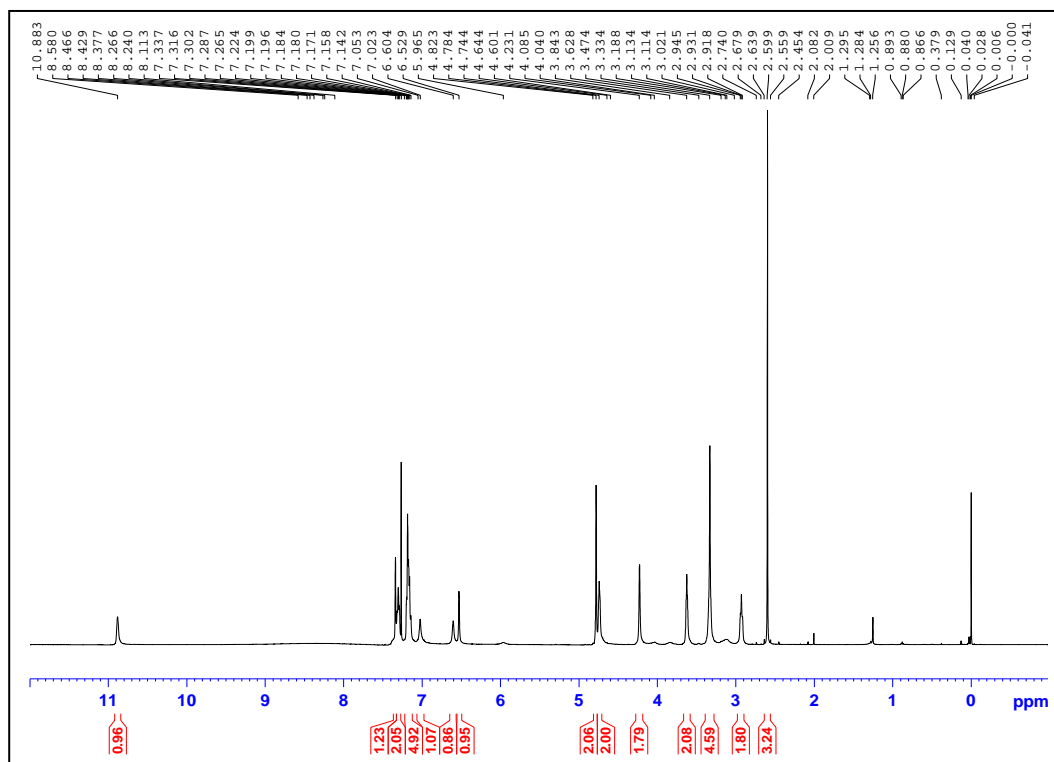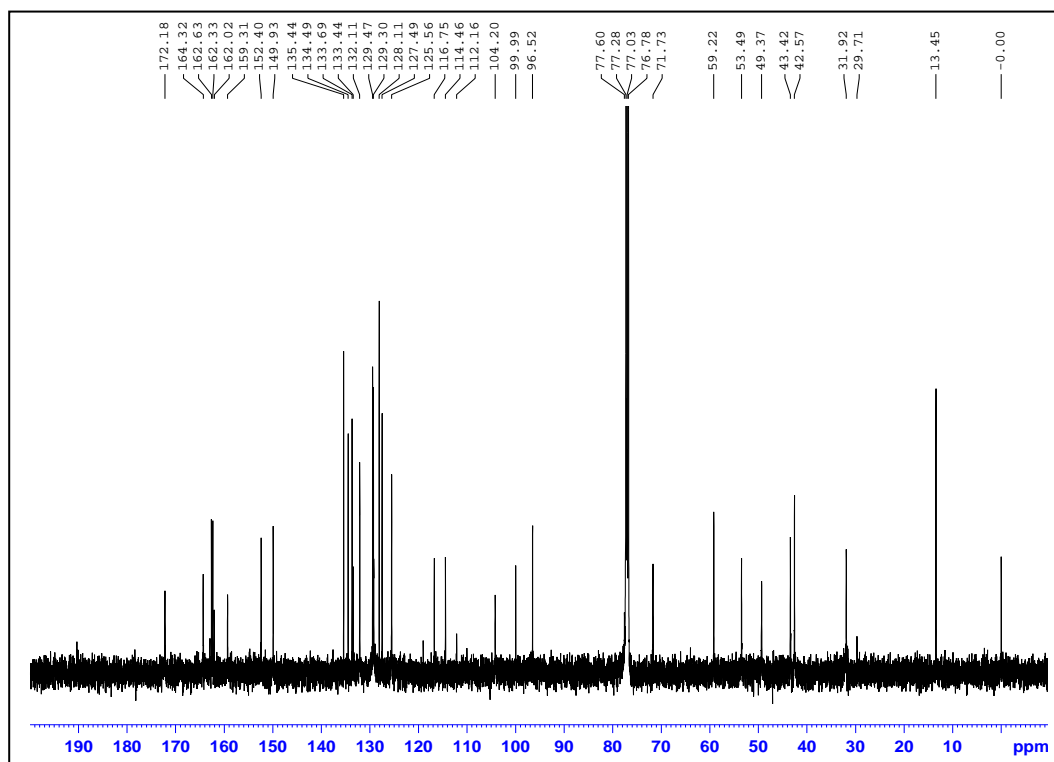

14d

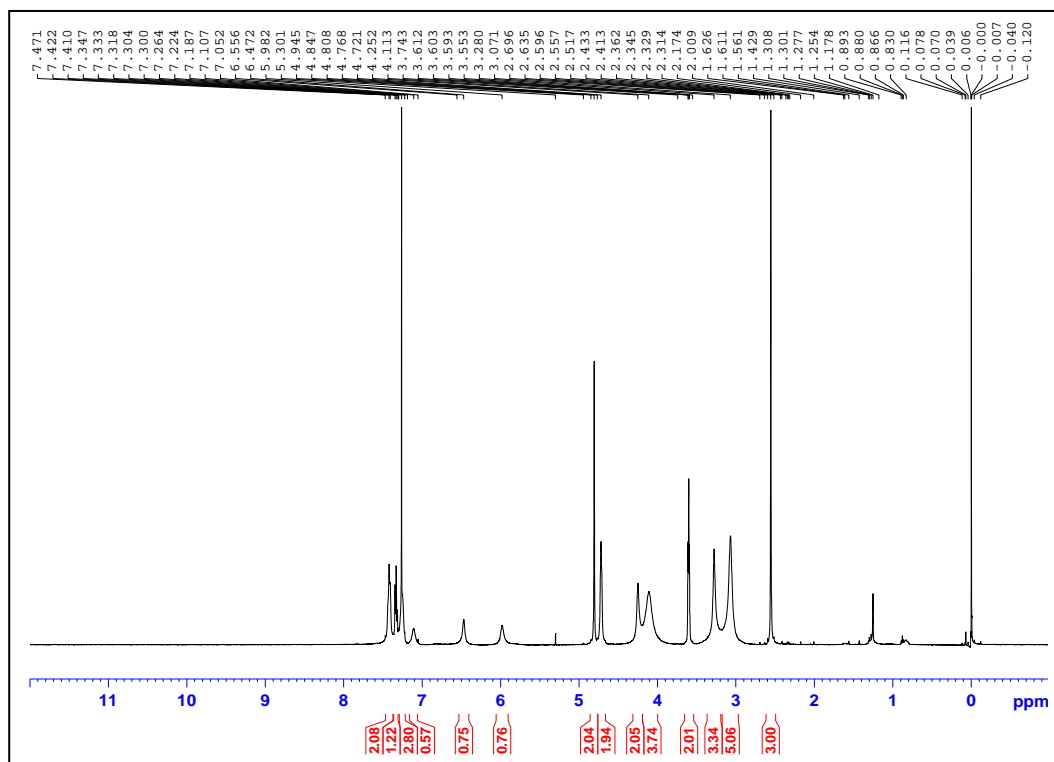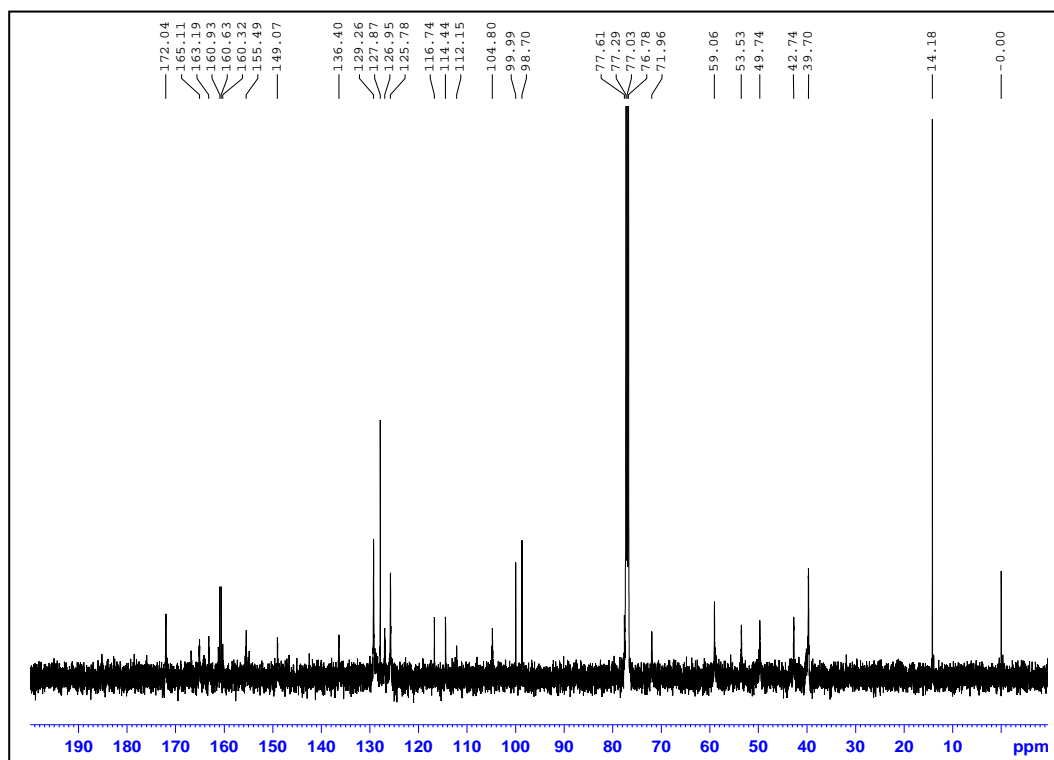

14e

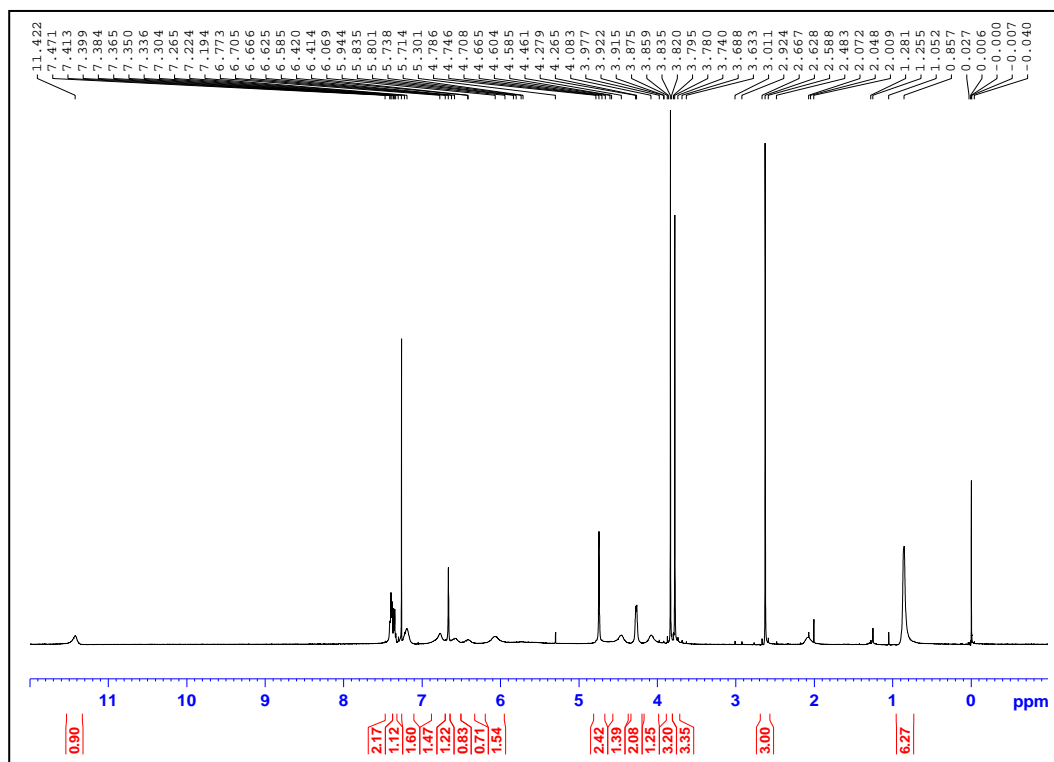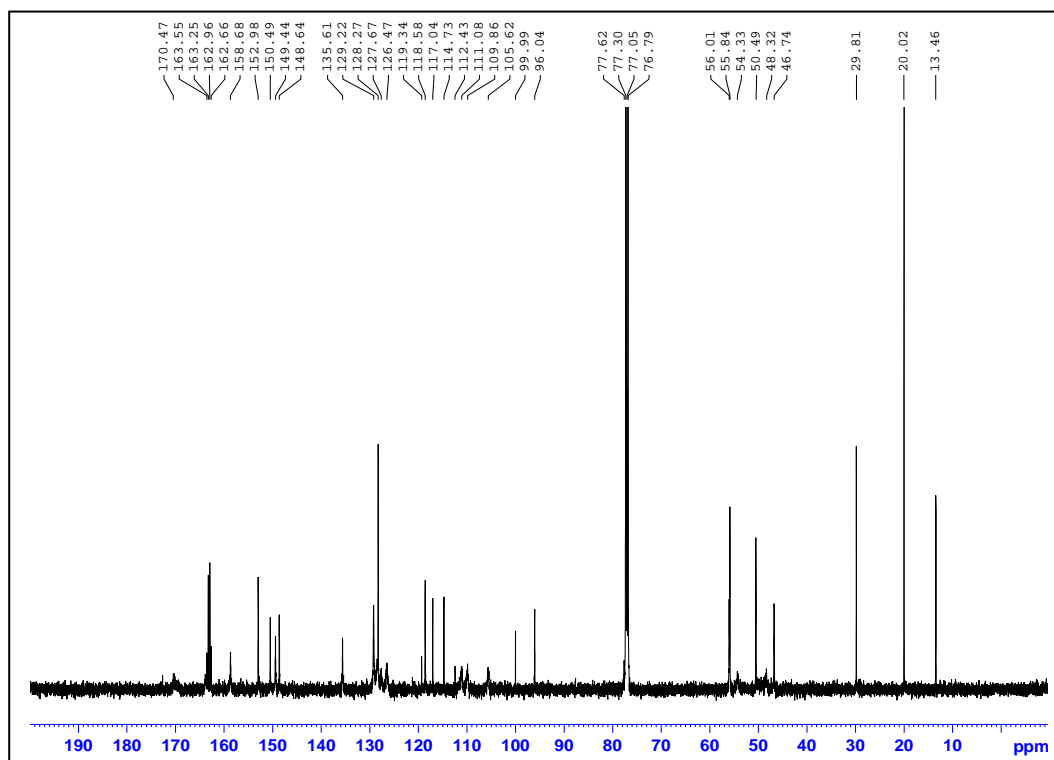

14f

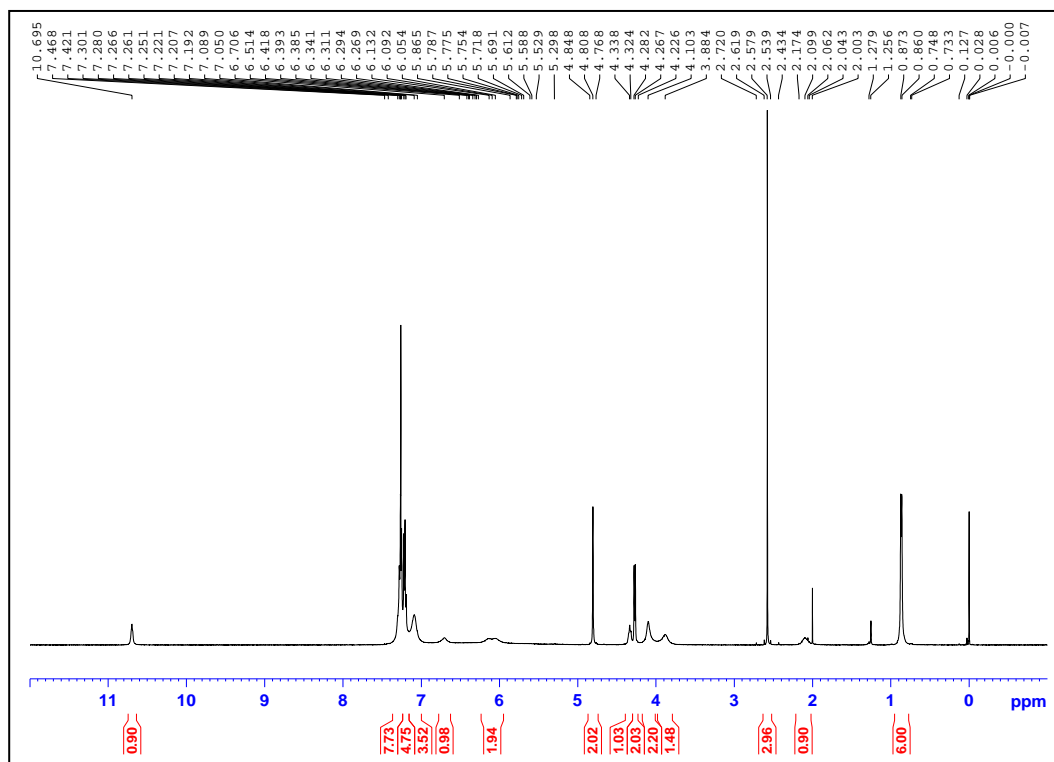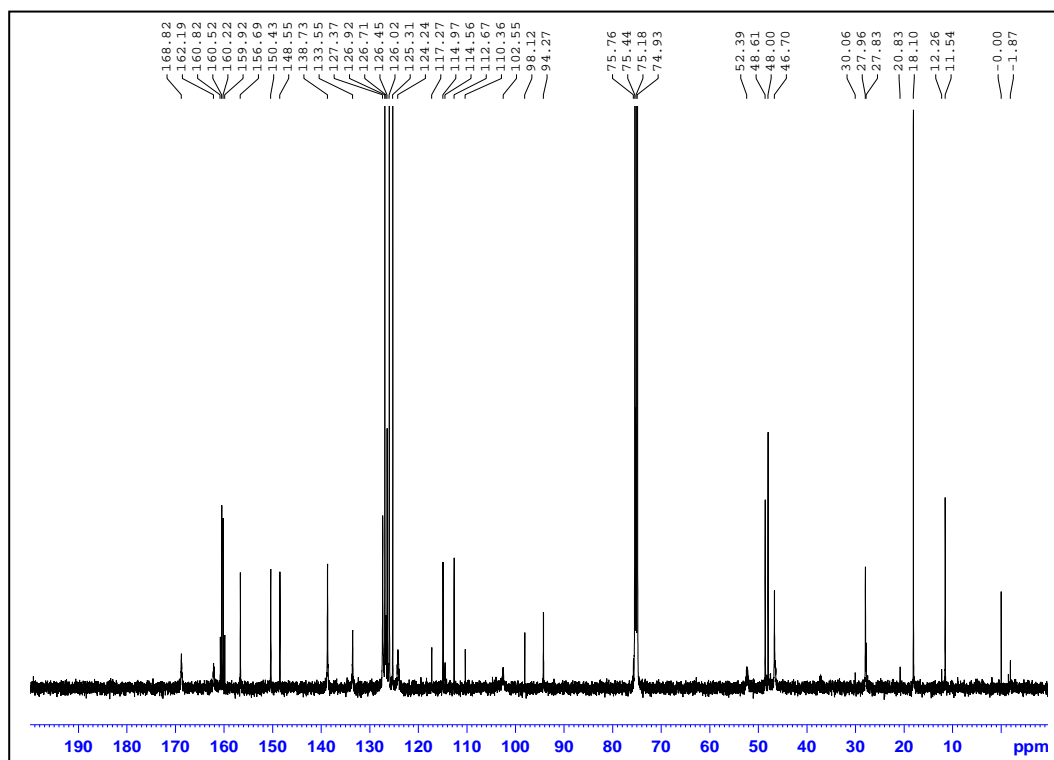

14g

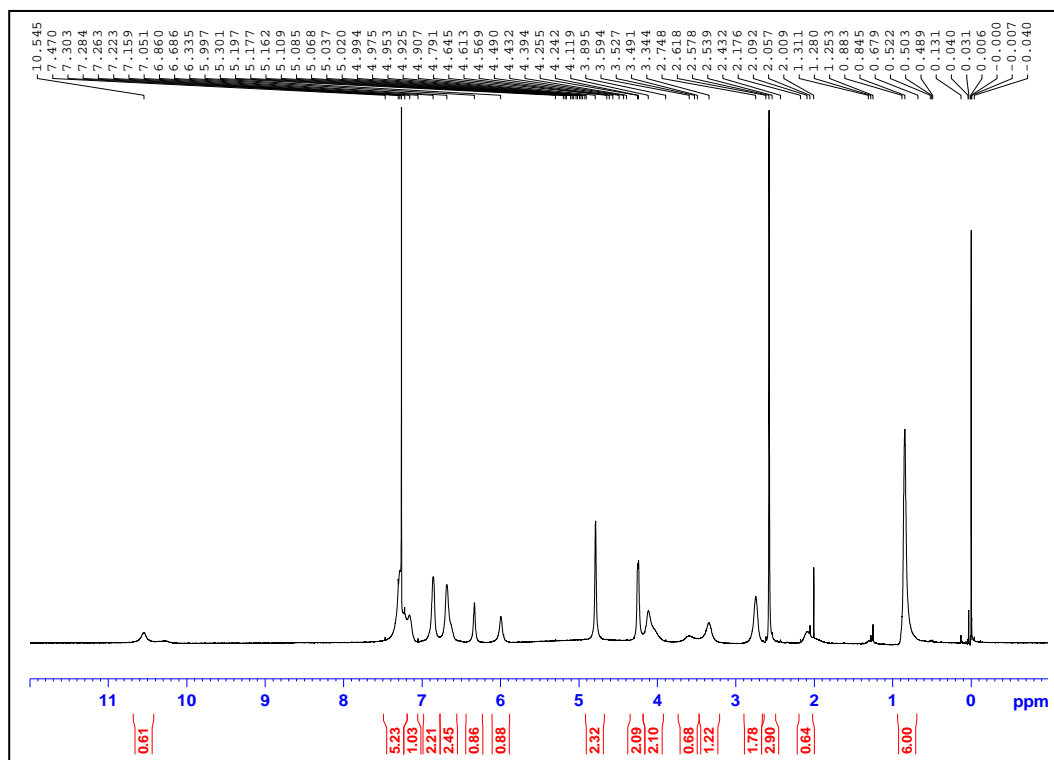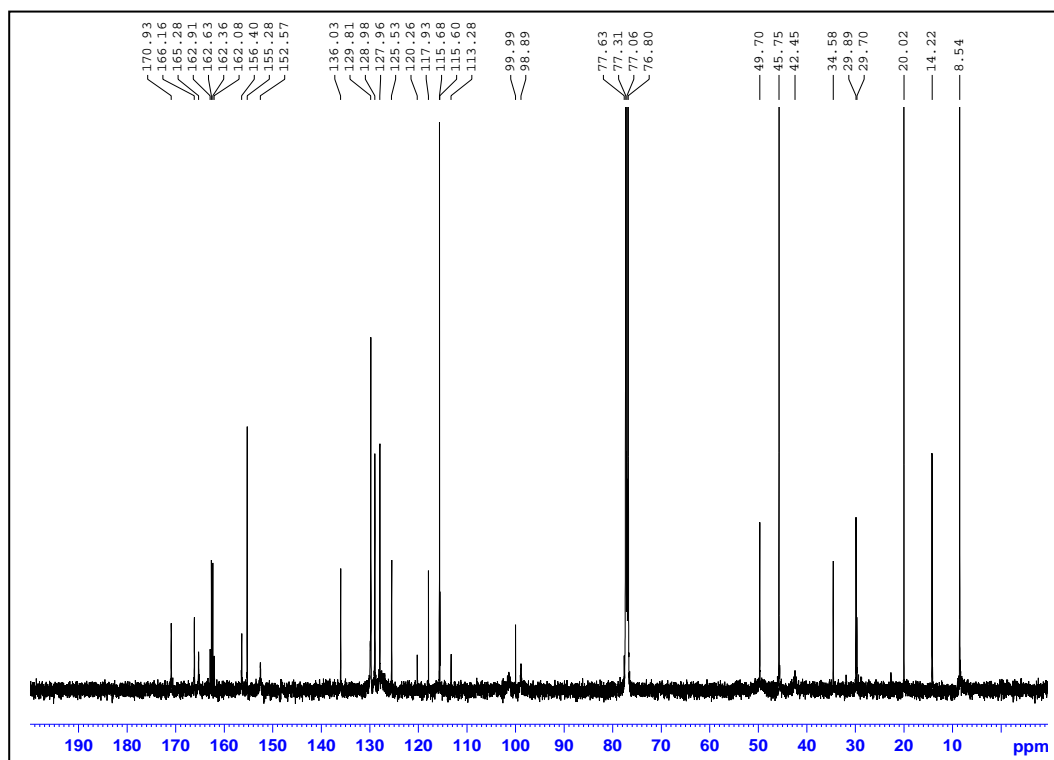



14h

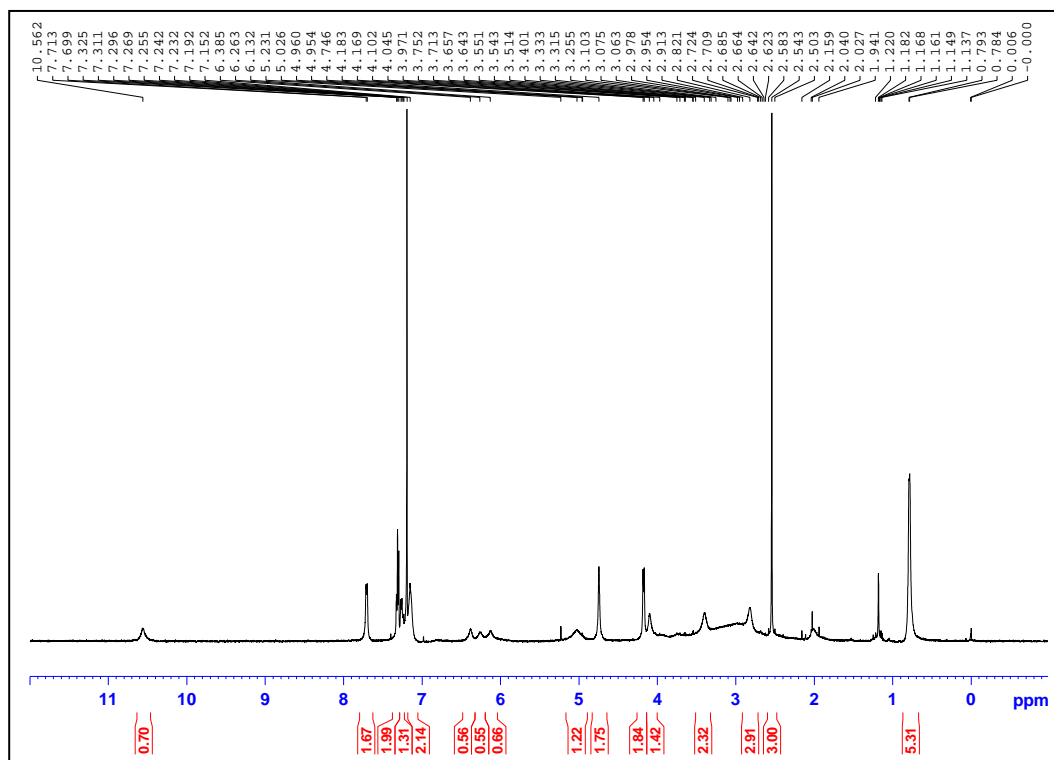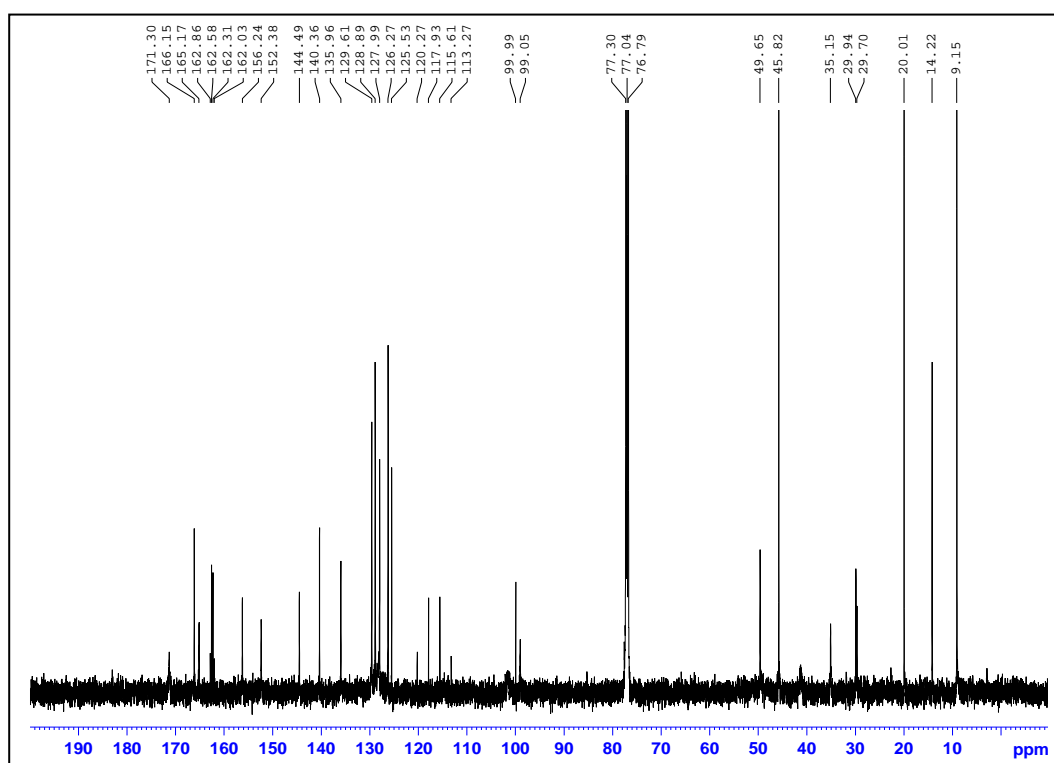

**Figure S4.**  $^1\text{H}$  and  $^{13}\text{C}$  NMR spectra for compounds **15**.

**15-1A**

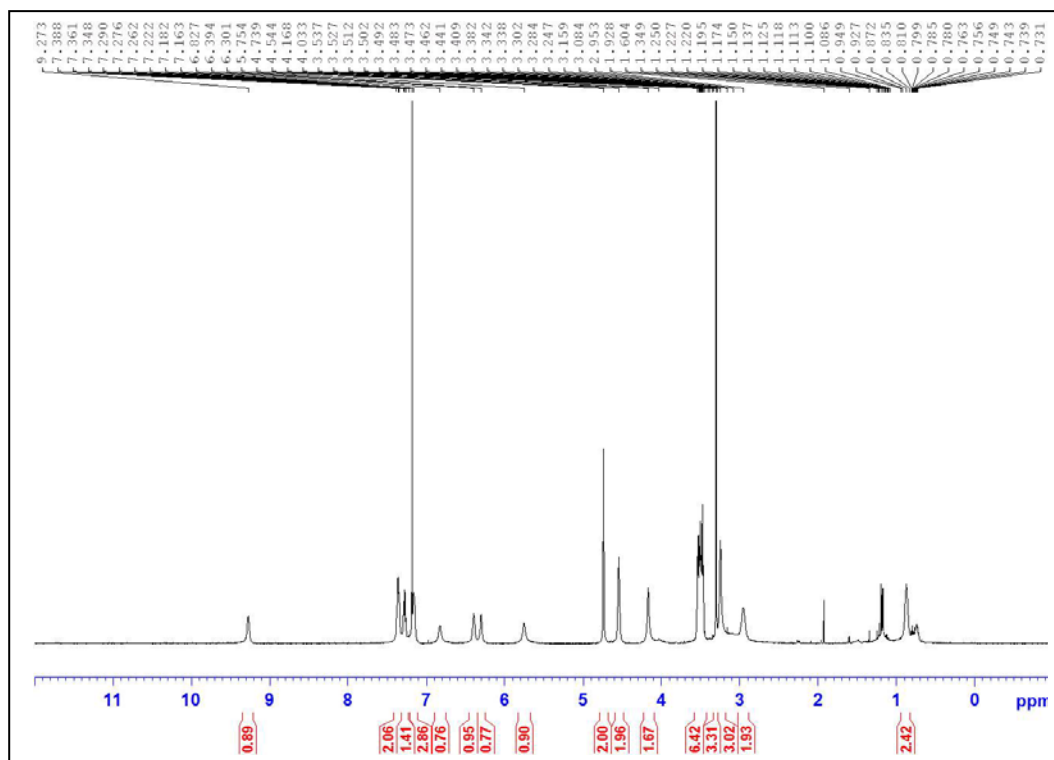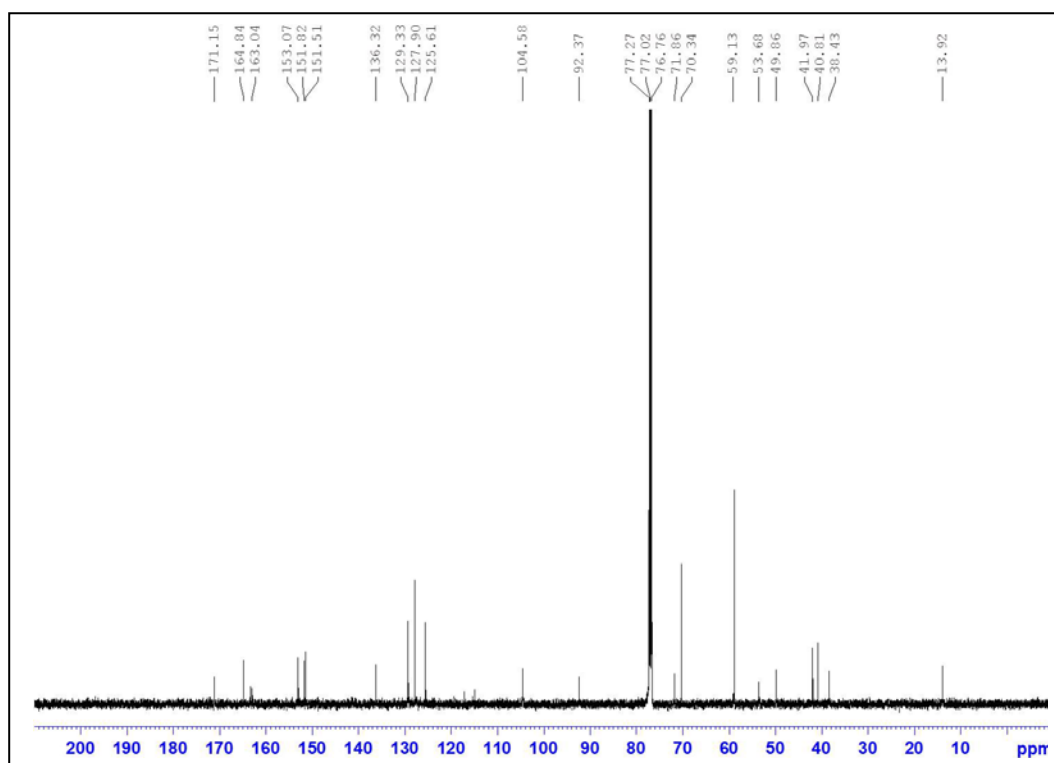

### 15-2B

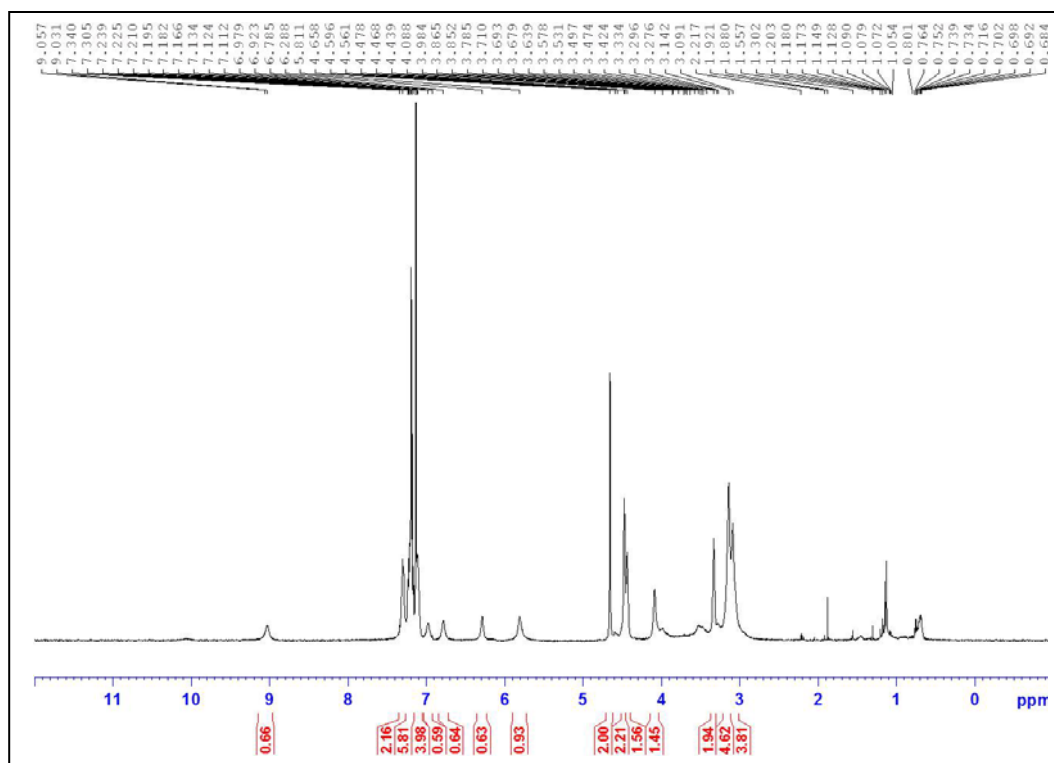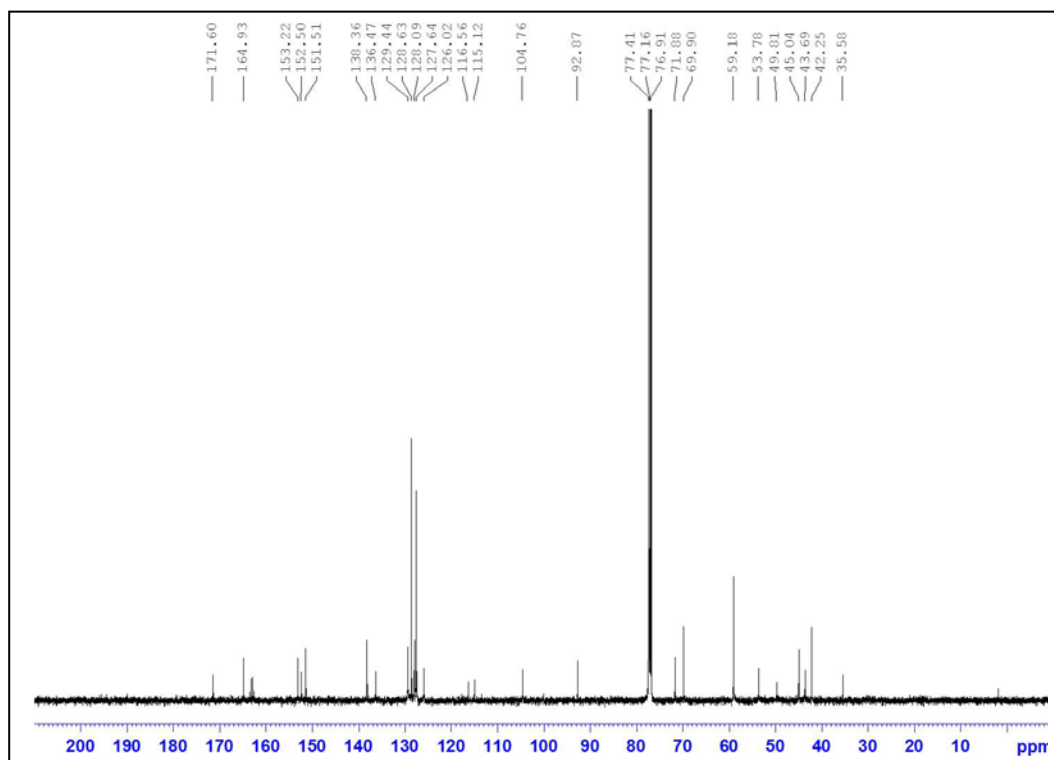

### 15-3C

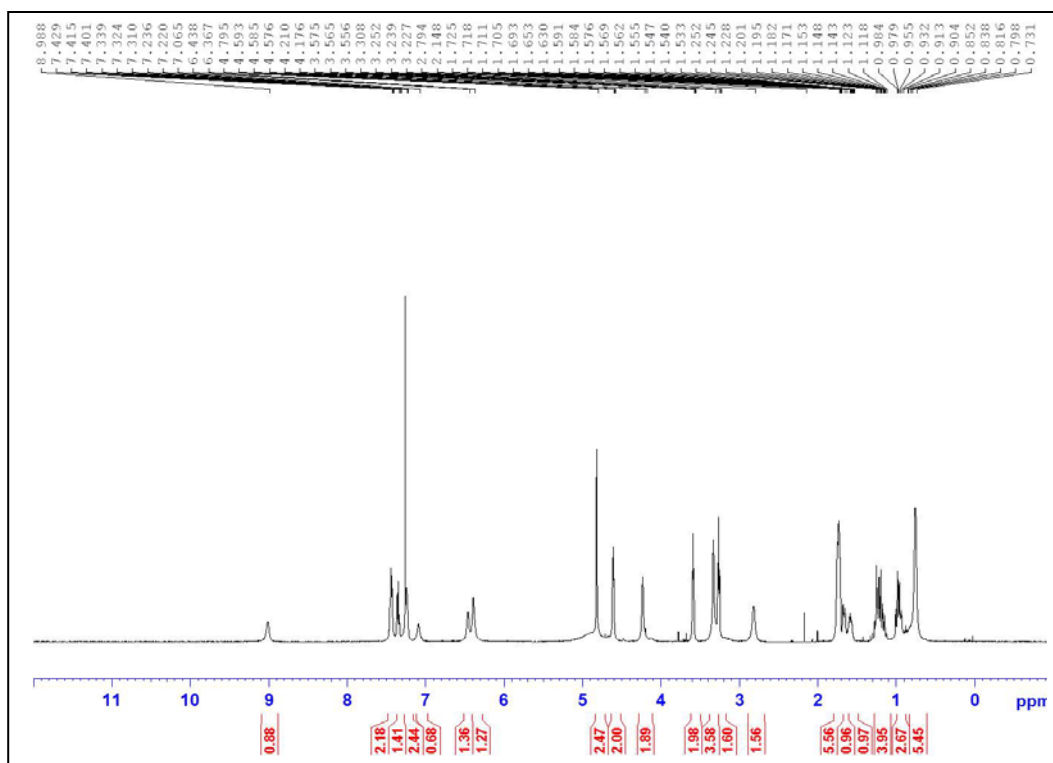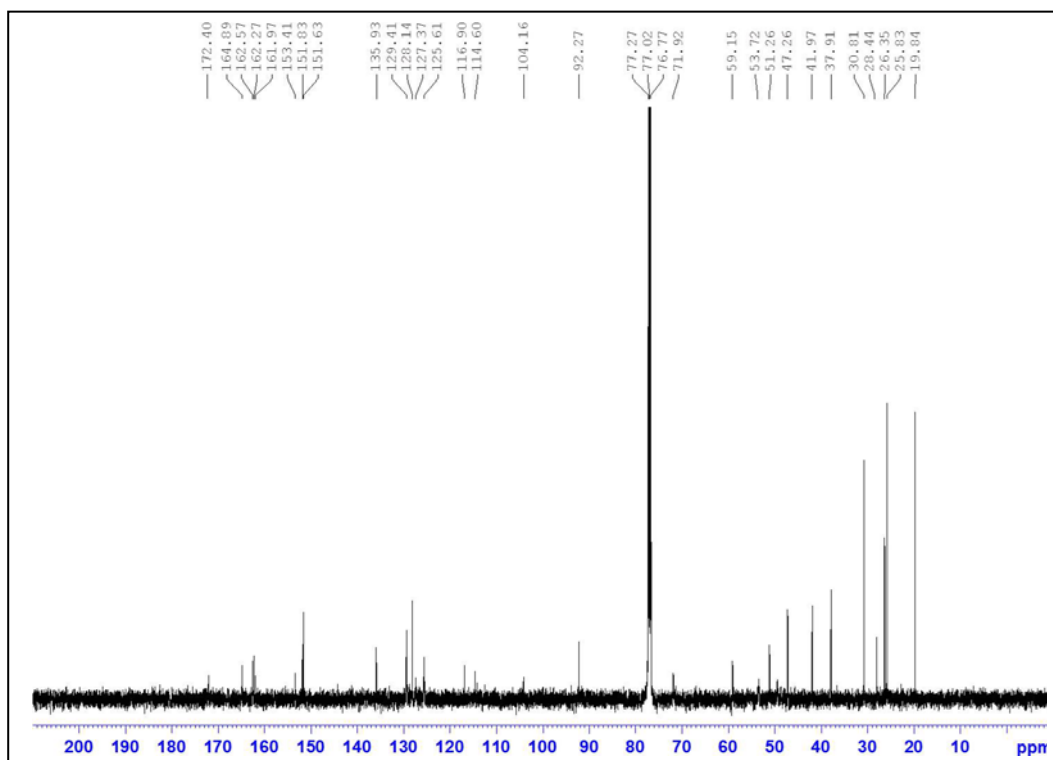

### 15-4D

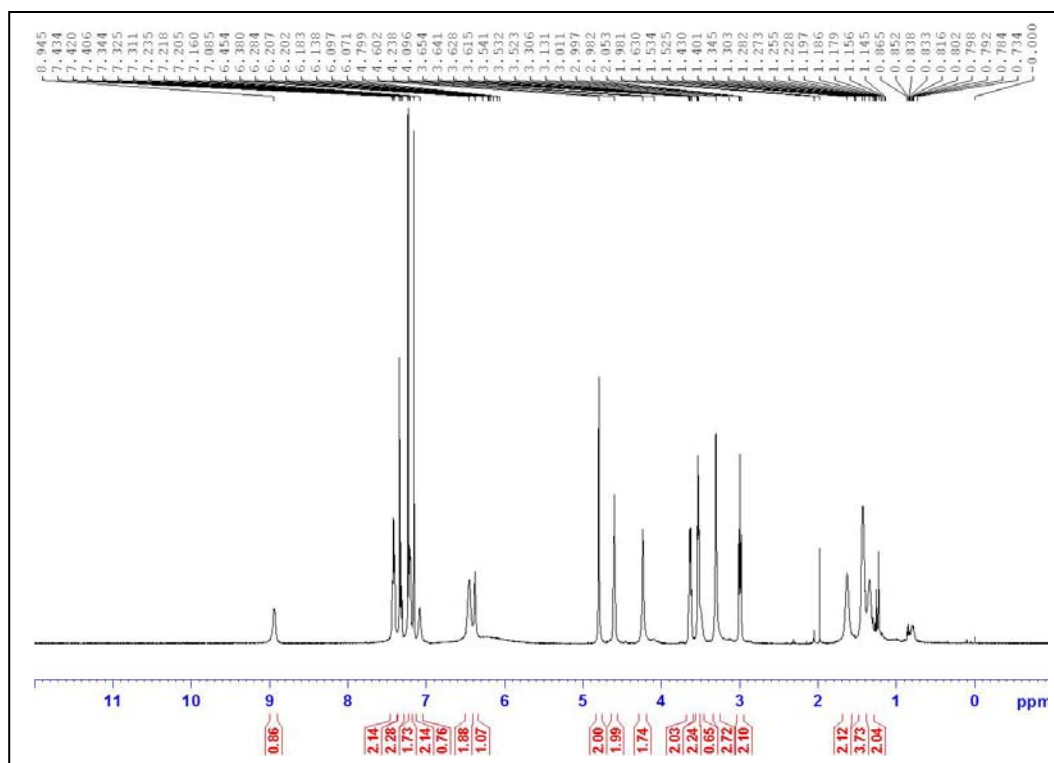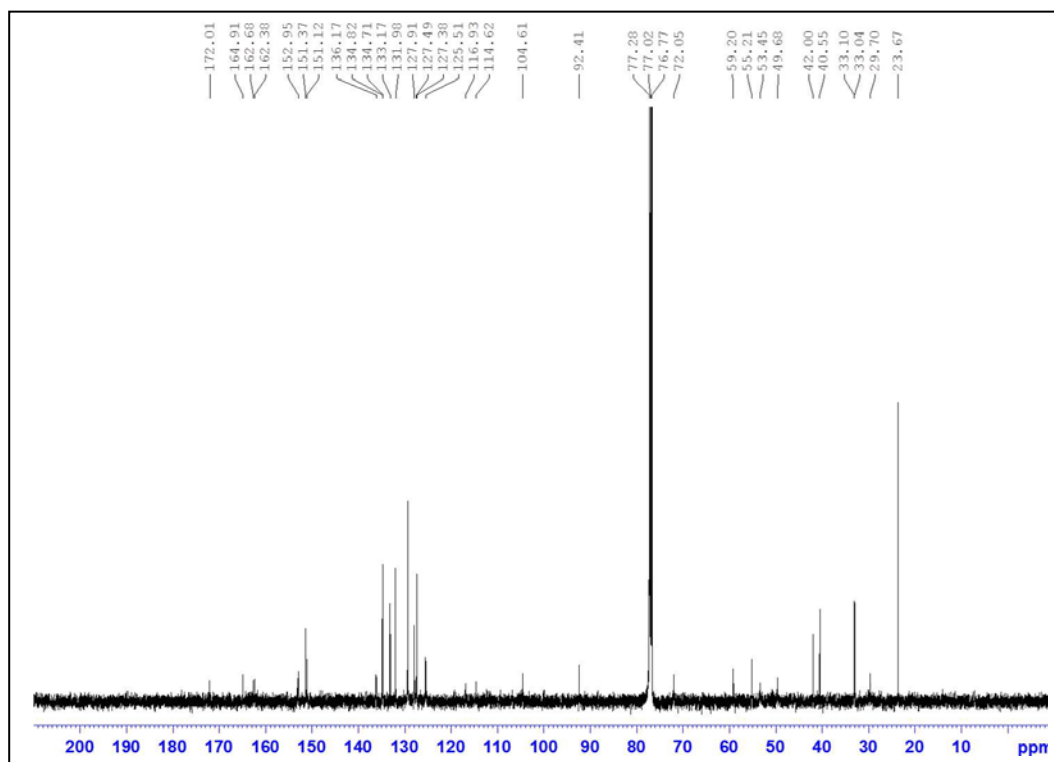

### 15-5E

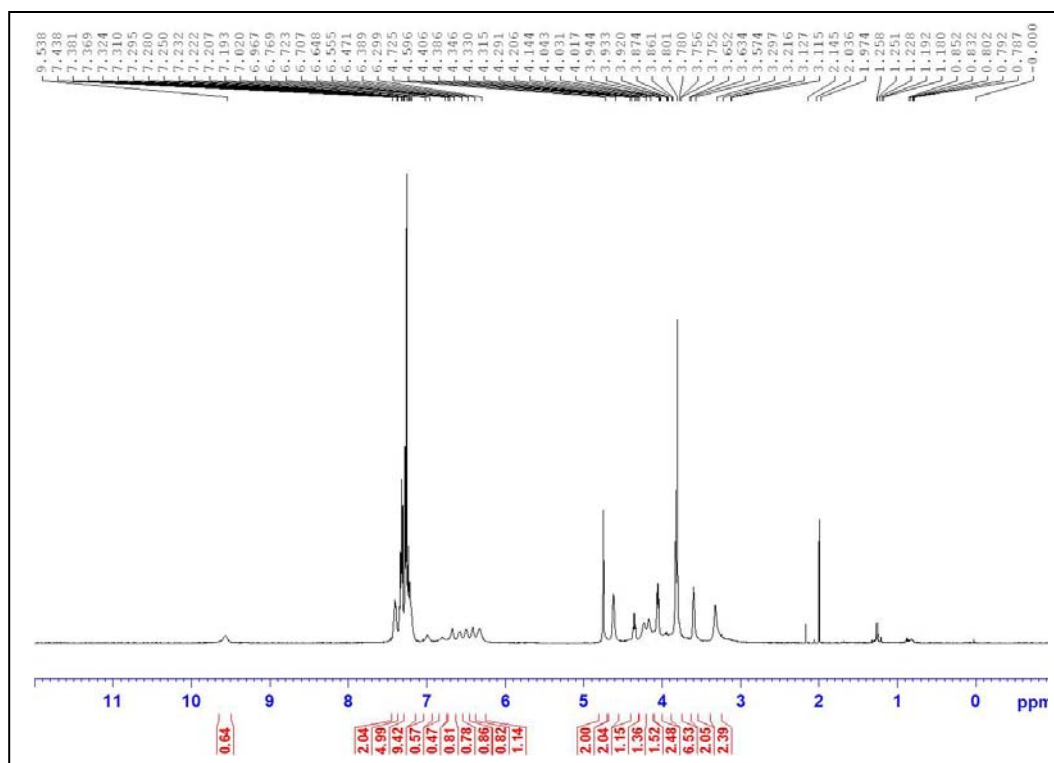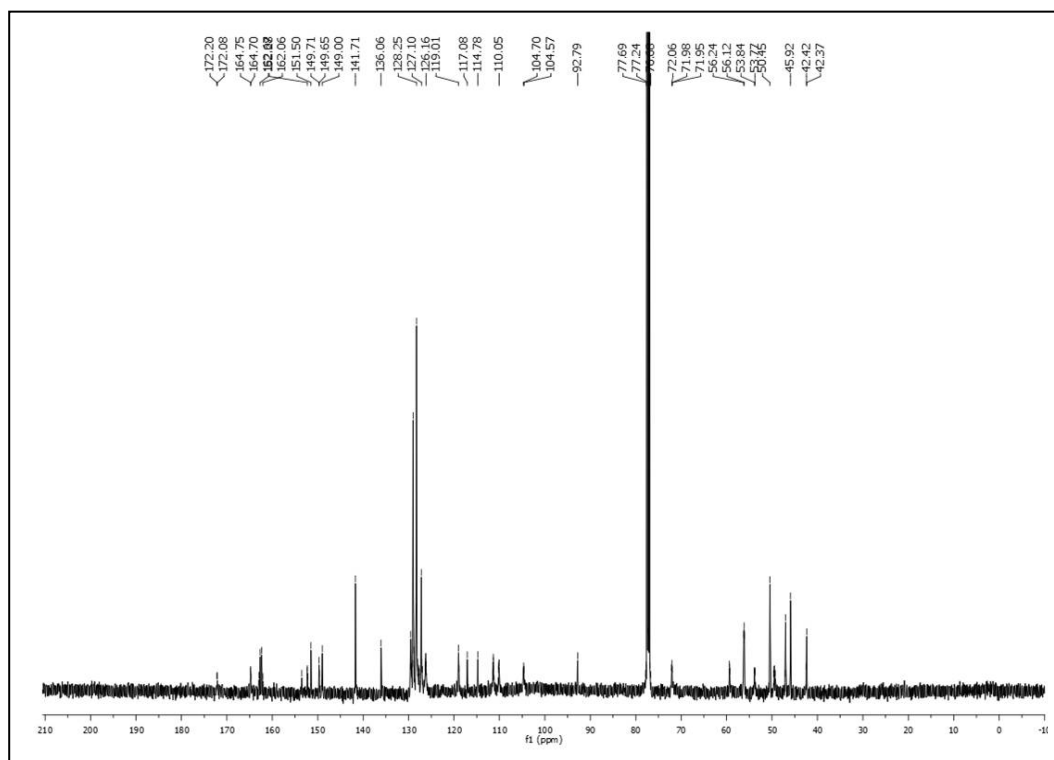

### 15-6F

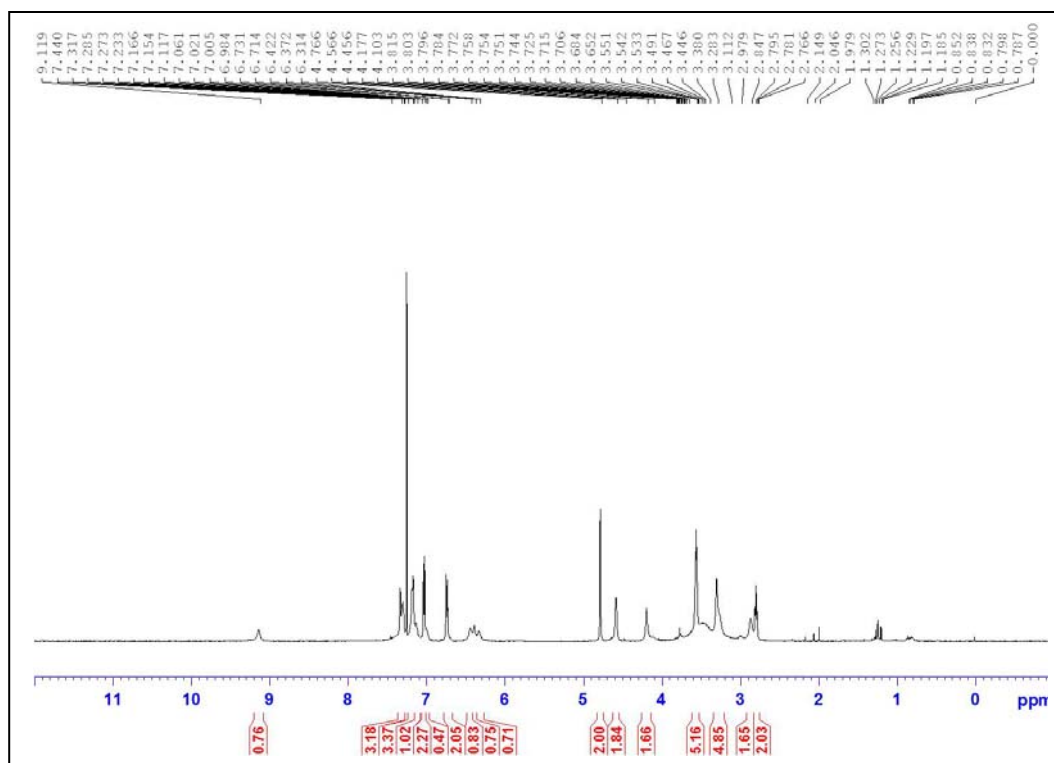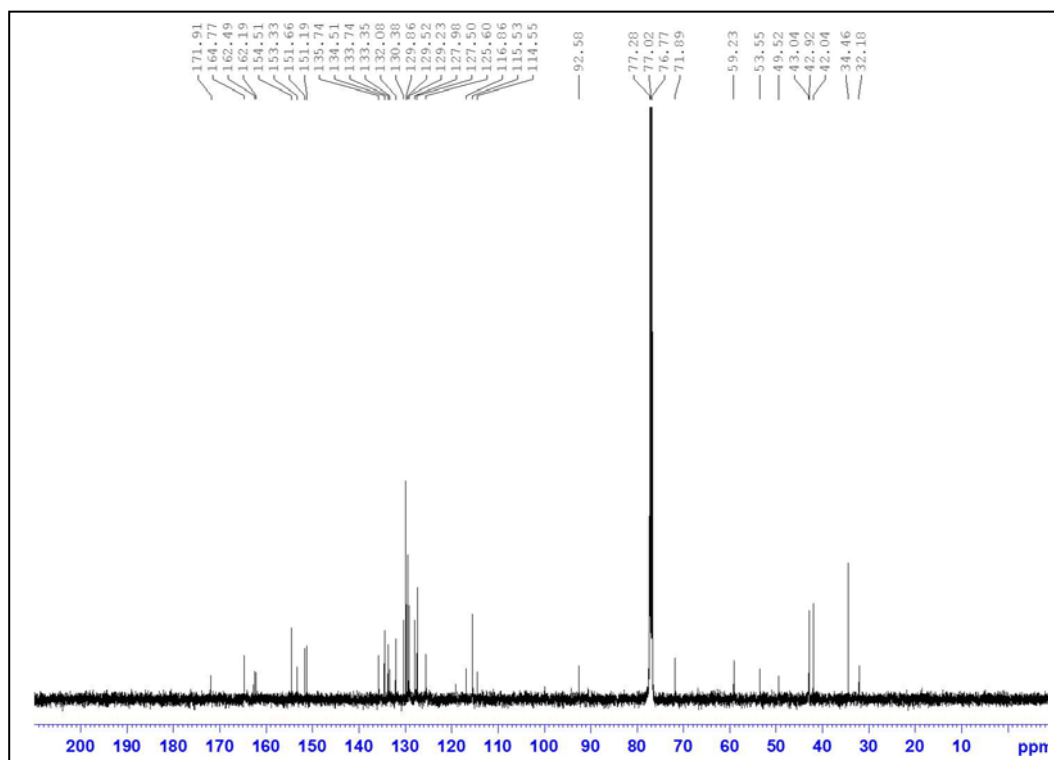

15-7G

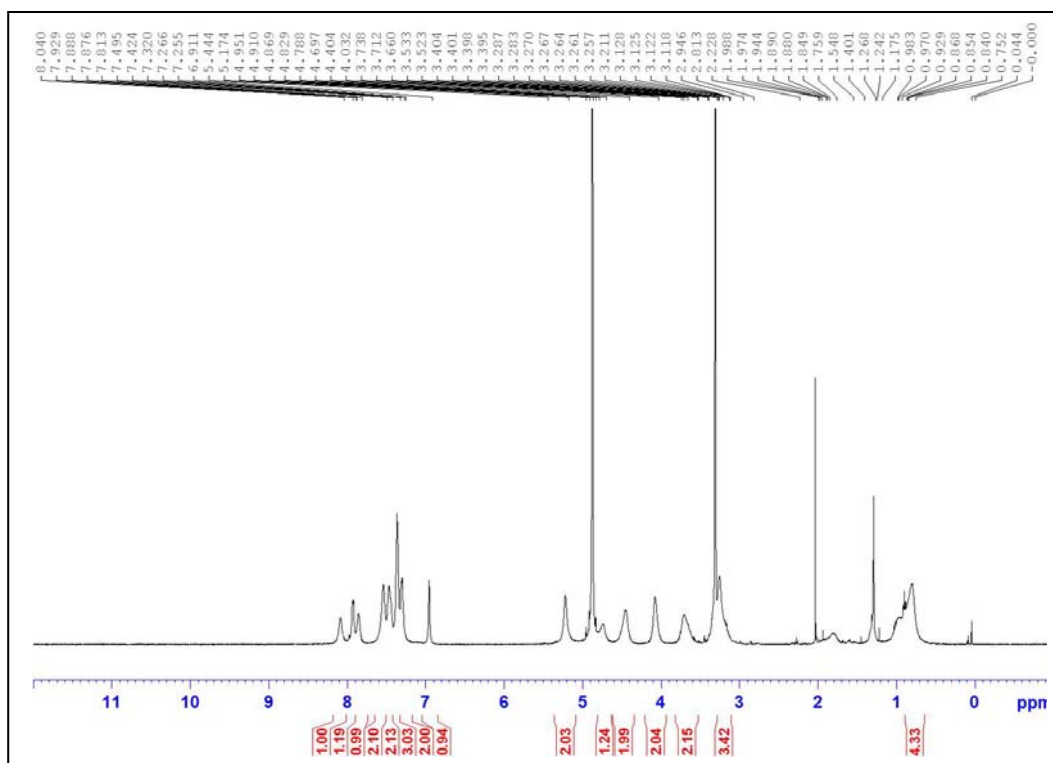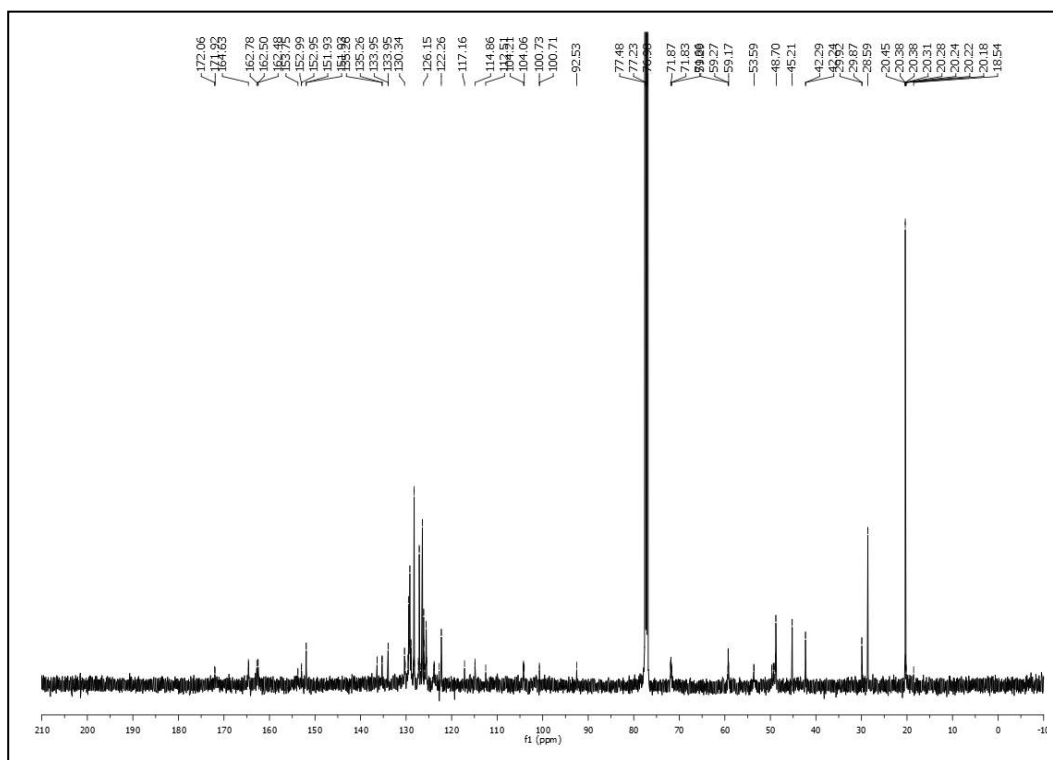



### 15-12H

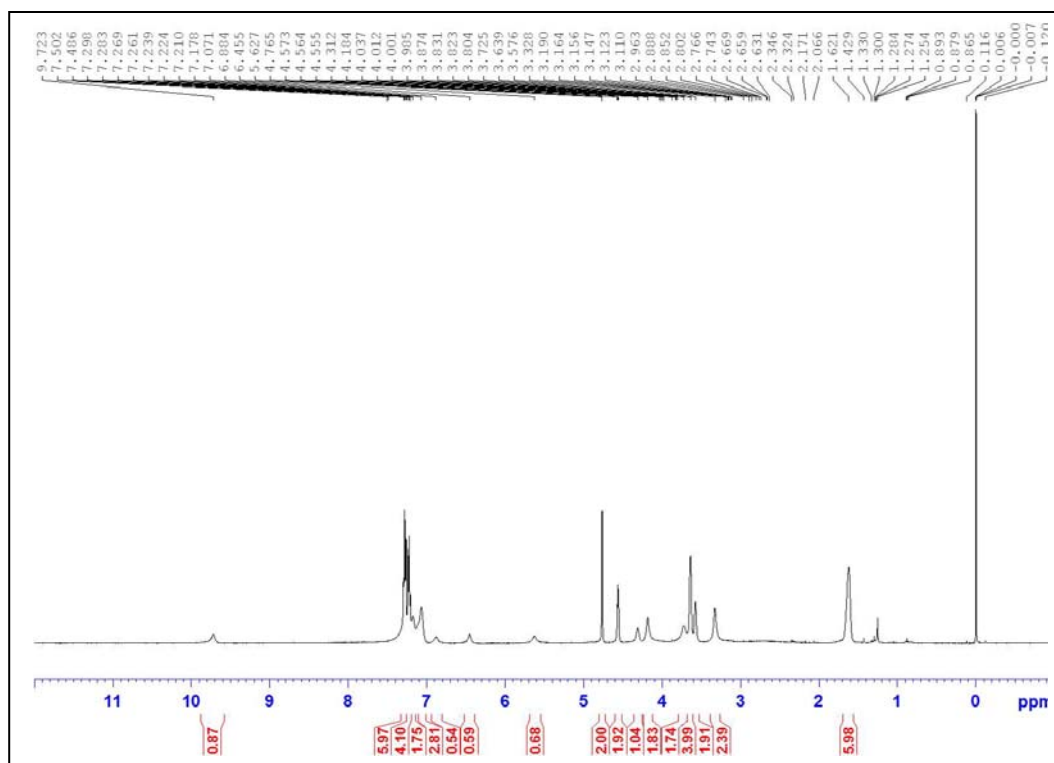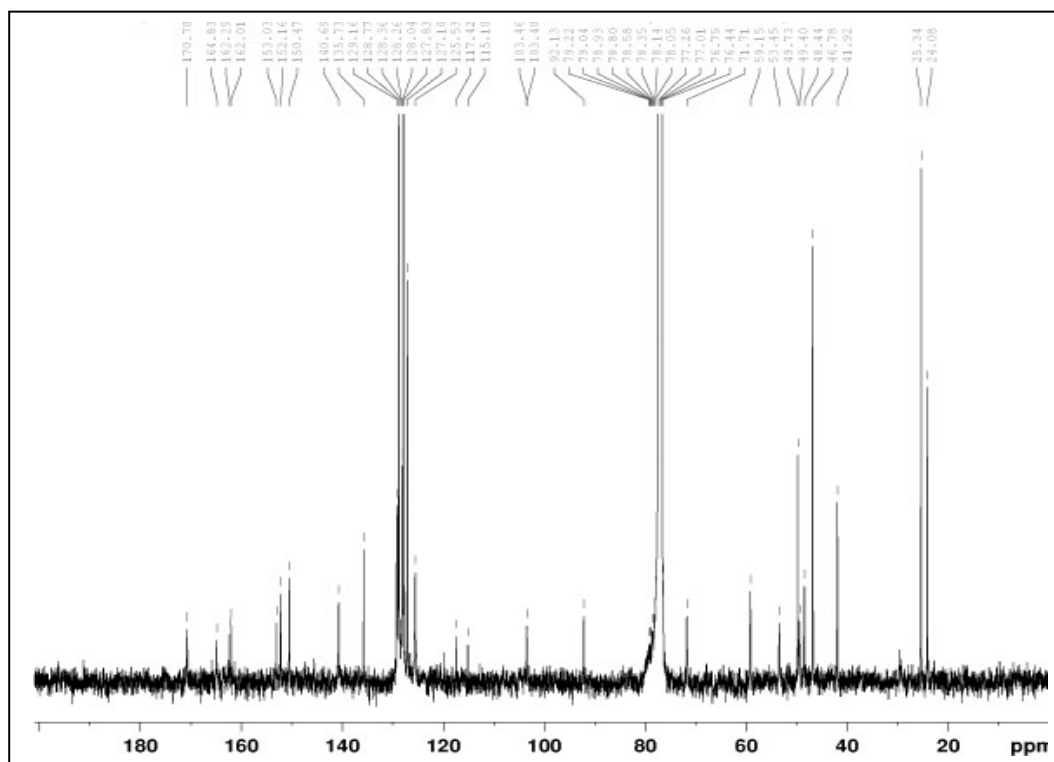

15-9I

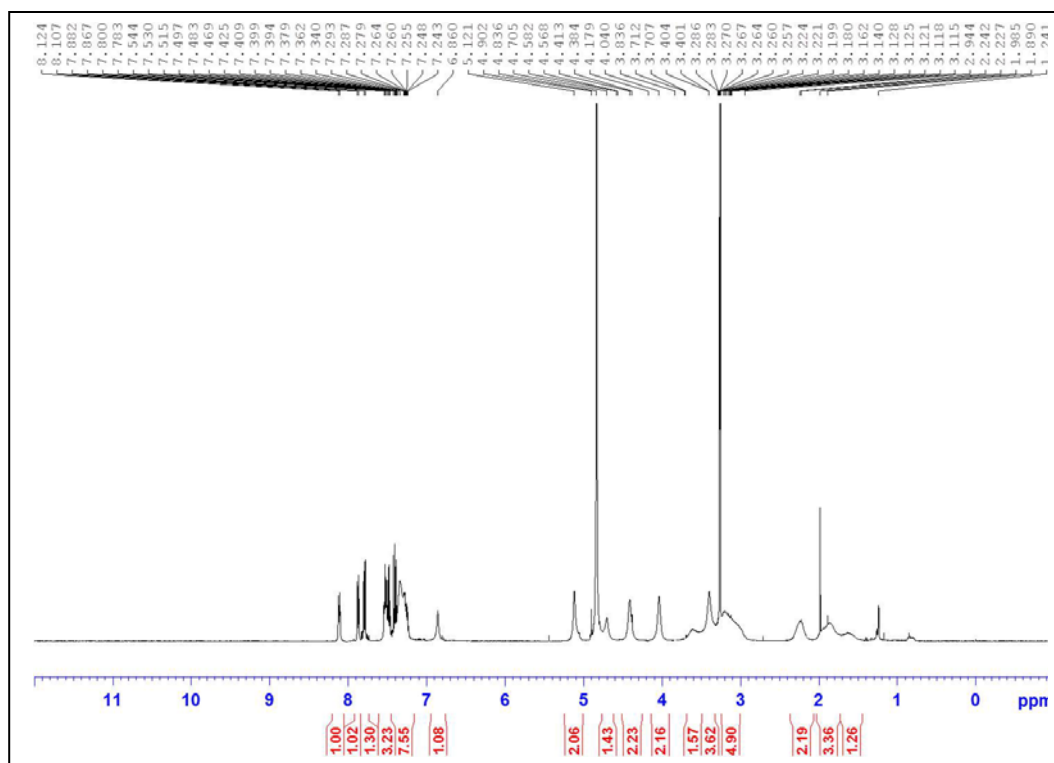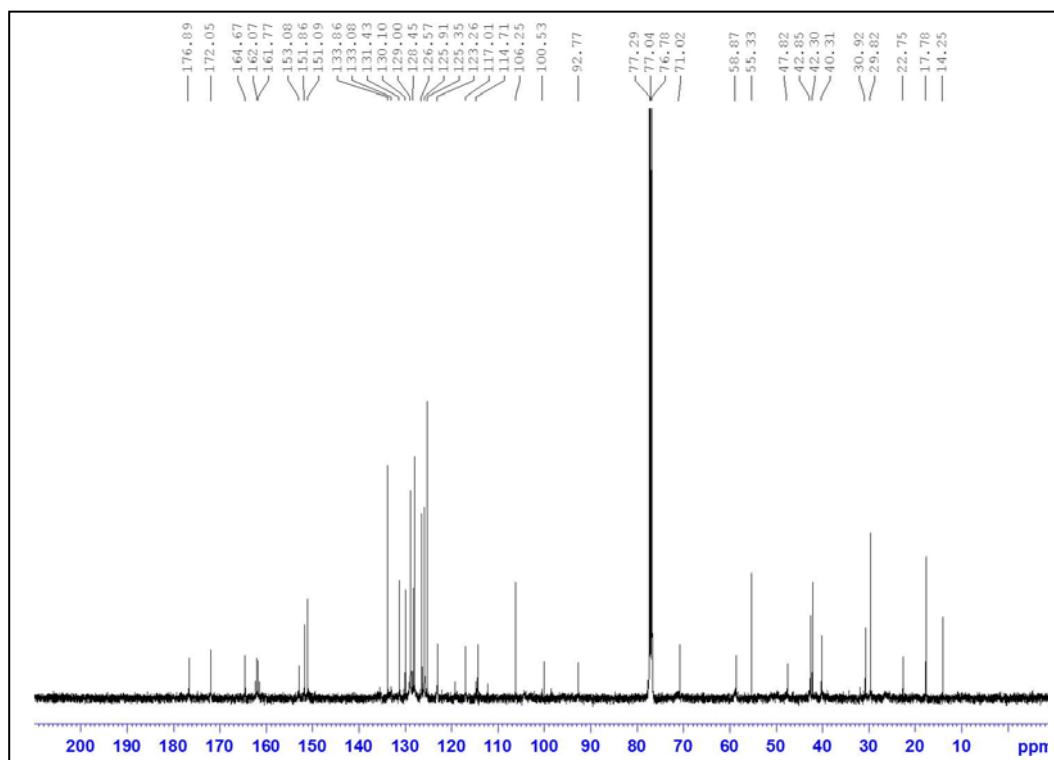

### 15-10A

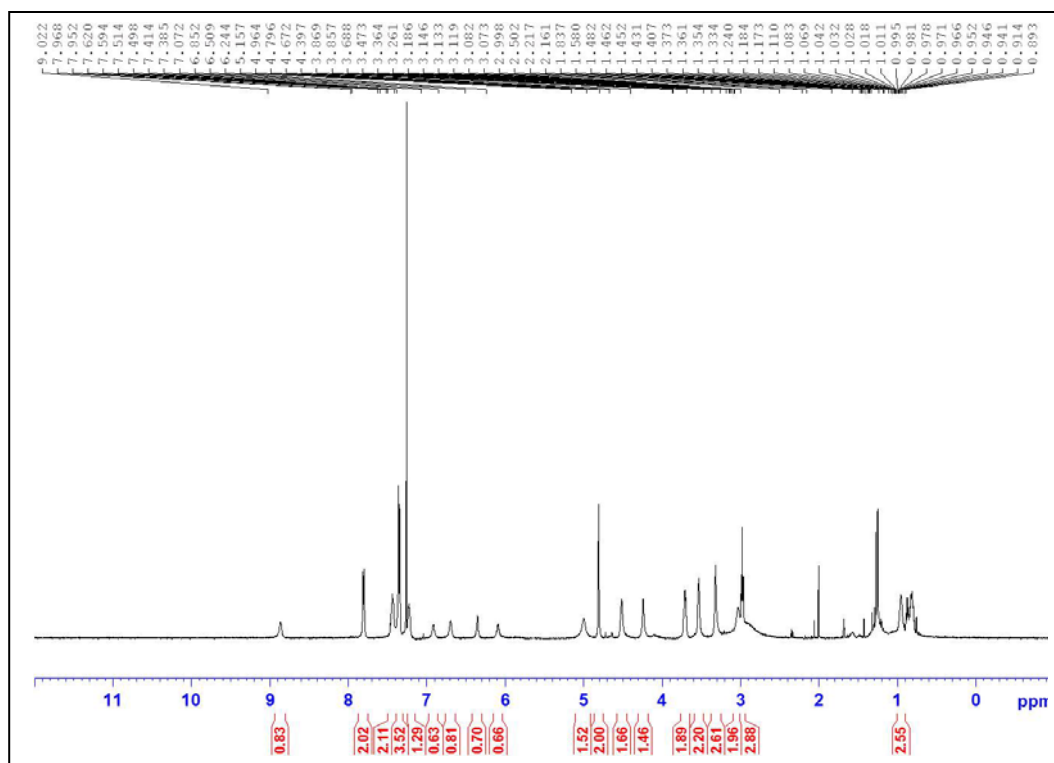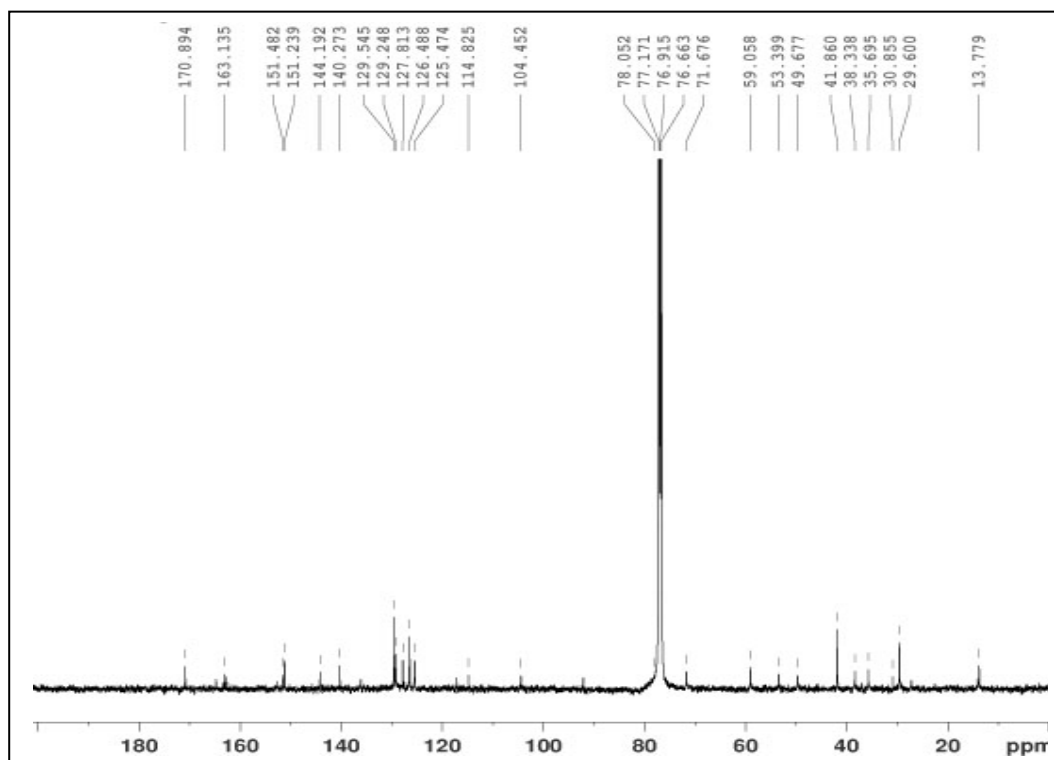

### 15-11B

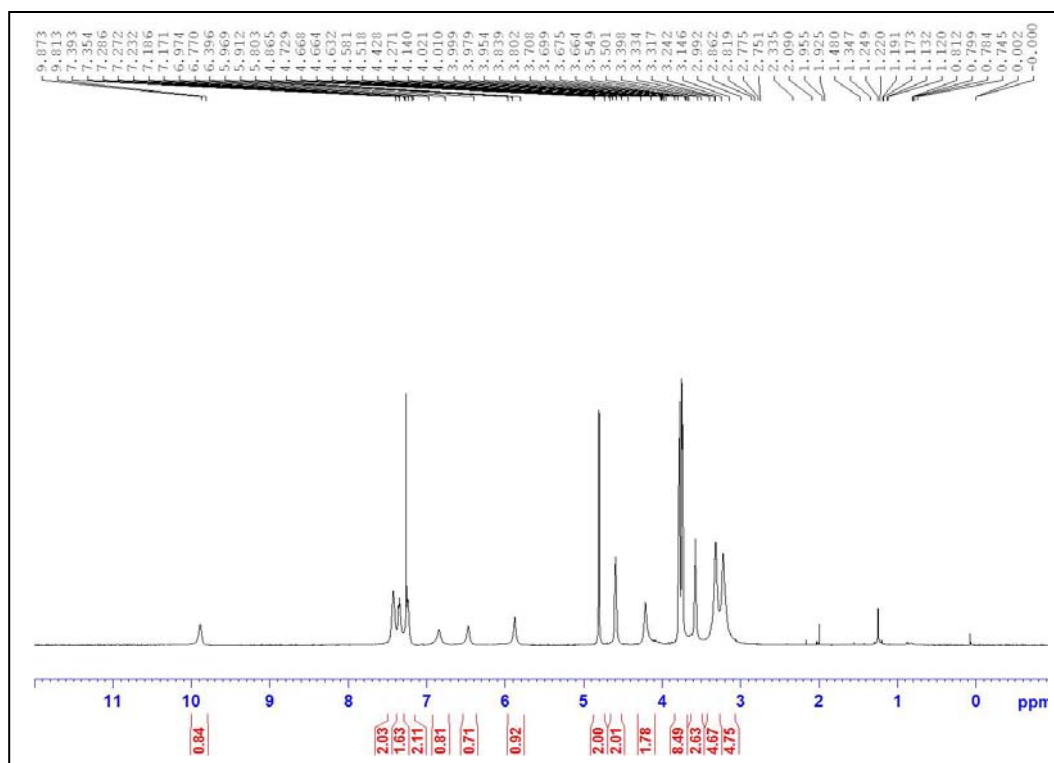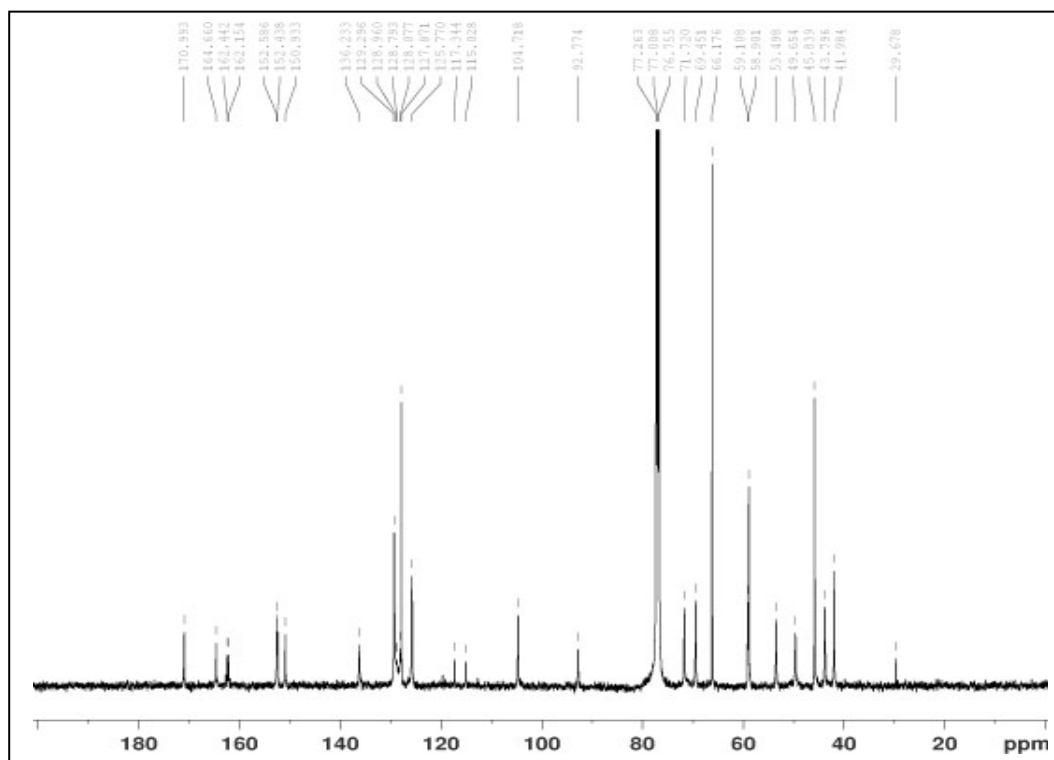

15-8C

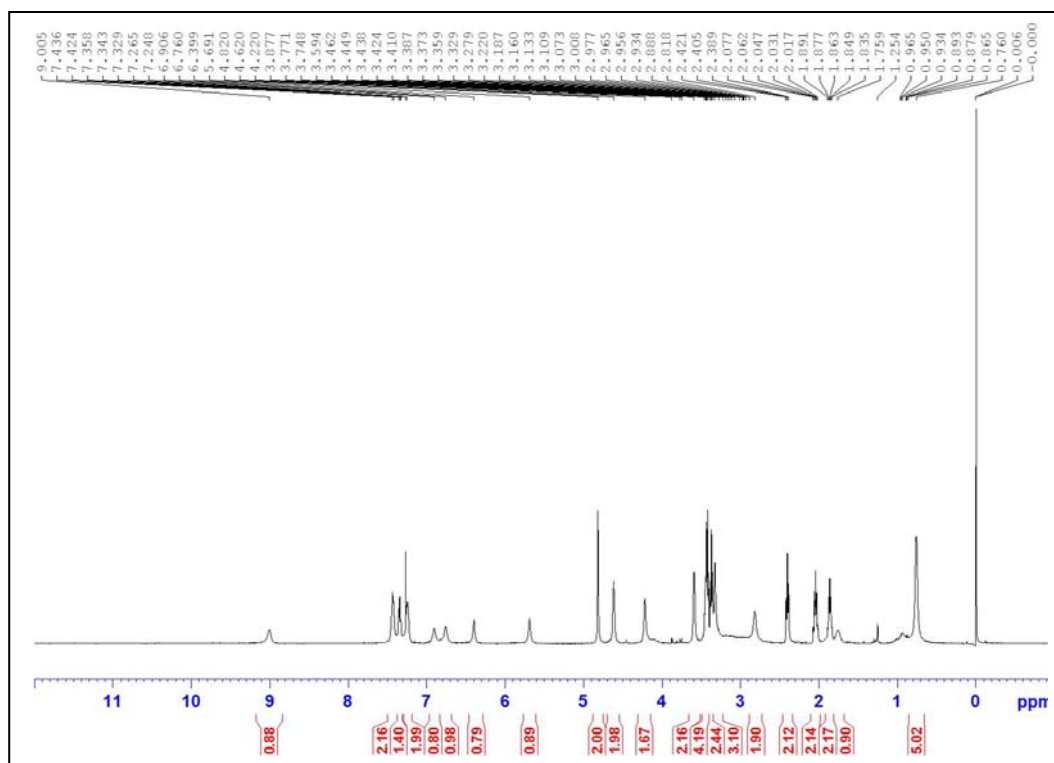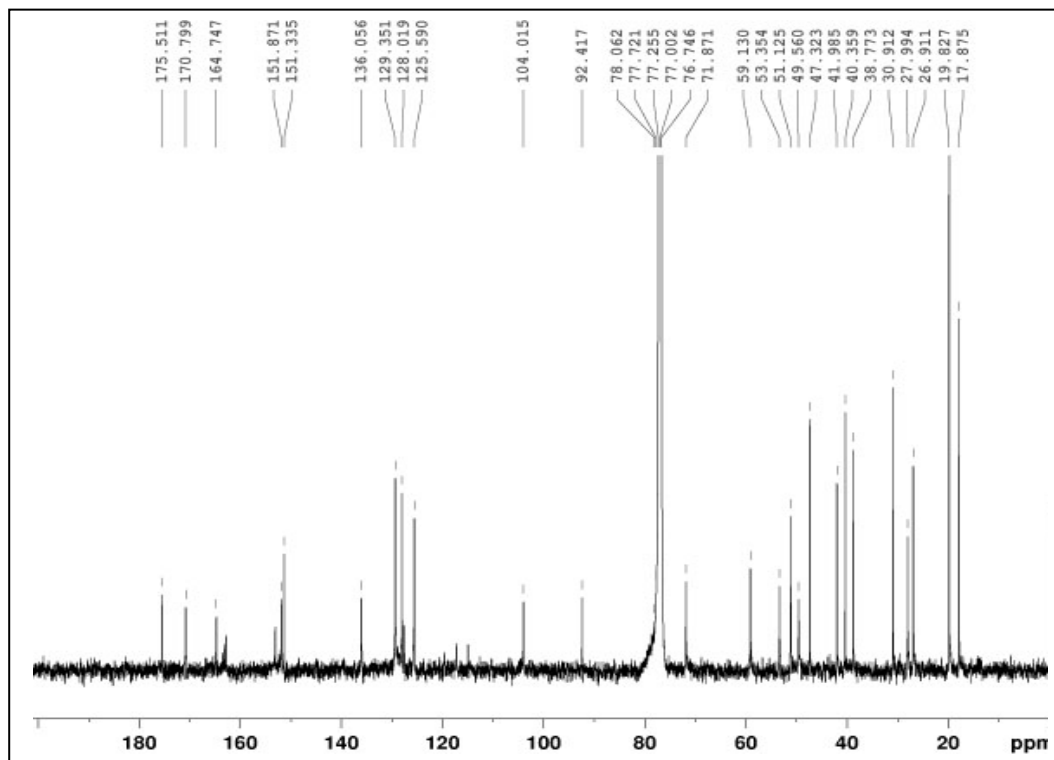

Supplement: c2ob06899k.pdf [file c2ob06899k.pdf]
